# Supplementary material for: Anti-inflammatory therapy with nebulized dornase alfa for severe COVID-19 pneumonia: a randomized unblinded trial
Source: eLife. 2024 Jul 16;12:RP87030. doi: 10.7554/eLife.87030 (PMC11251720; doi:10.7554/eLife.87030)
Supplement: Figure 1—figure supplement 2—source data 1. [file elife-87030-fig1-figsupp2-data1.xlsx]

## Sheet: S2
		Fig. S2
		Subject	crp	Sex	Age	BMI	comorbidity	trt	type
		R-BAC+DA	46.5	Male	50	26.2773	1	1	1
		R-BAC+DA	60.2	Male	42	32.119	0	1	1
		R-BAC+DA	261.5	Male	65	28.6661	1	1	1
		R-BAC+DA	90.5	Female	48	24.974	1	1	1
		R-BAC+DA	64.3	Male	76	23.2005	0	1	1
		R-BAC+DA	123.6	Male	67	25.6	1	1	1
		R-BAC+DA	166.9	Male	65	22.9918	0	1	1
		R-BAC+DA	130.7	Male	58	20.702	0	1	1
		R-BAC+DA	88	Female	69	30.4451	1	1	1
		R-BAC+DA	204	Male	54	24.8981	1	1	1
		R-BAC+DA	78.2	Male	58	26.6772	1	1	1
		R-BAC+DA	70.9	Male	40	27.3278	0	1	1
		R-BAC+DA	59.7	Male	46	23.473	0	1	1
		R-BAC+DA	63.5	Female	59	32.6678	1	1	1
		R-BAC+DA	84.6	Male	68	21.9713	1	1	1
		R-BAC+DA	125.6	Male	69	29.8056	1	1	1
		R-BAC+DA	25.2	Male	47	24.2587	1	1	1
		R-BAC+DA	30.7	Male	56	31.0035	1	1	1
		R-BAC+DA	106.8	Female	71	35.4173	1	1	1
		R-BAC+DA	155.3	Male	61	25.3979	1	1	1
		R-BAC+DA	79.6	Male	41	25.4694	0	1	1
		R-BAC+DA	50.1	Female	49	41.6614	0	1	1
		R-BAC+DA	117.8	Male	70	30.095	0	1	1
		R-BAC+DA	84.4	Female	67	23.8806	0	1	1
		R-BAC+DA	155.9	Male	77	26.7755	0	1	1
		R-BAC+DA	156.1	Male	51	33.7346	0	1	1
		R-BAC+DA	64.4	Male	35	29.2259	0	1	1
		R-BAC+DA	83.3	Male	44	24.8765	0	1	1
		R-BAC+DA	108.3	Female	69	34.3678	0	1	1
		R-BAC+DA	119.4	Male	32	25.2493	0	1	1
		CC-BAC	96.6	Male	60	20.9	1	0	0
		CC-BAC	35.7	Male	30	42	0	0	0
		CC-BAC	336.4	Female	64	31.4	1	0	0
		CC-BAC	39.1	Male	43	31.7	0	0	0
		CC-BAC	73.4	Male	82	24.4	1	0	0
		CC-BAC	201.8	Male	48	28.1	1	0	0
		CC-BAC	31.4	Female	38	20.4	1	0	0
		CC-BAC	43.8	Female	54	36.7	1	0	0
		CC-BAC	60.2	Male	53	31.6	1	0	0
		CC-BAC	75.3	Male	51	25	0	0	0
		CC-BAC	50.4	Male	23	30.4	1	0	0
		CC-BAC	143.7	Male	42	43.8	0	0	0
		CC-BAC	197.5	Male	76	23.4	0	0	0
		CC-BAC	126.3	Male	78	23.6	0	0	0
		CC-BAC	68.1	Male	49	25.6	1	0	0
		CC-BAC	70.9	Female	51	37.1	0	0	0
		CC-BAC	88	Male	52	31.6	1	0	0
		CC-BAC	249	Male	47	22.6	0	0	0
		CC-BAC	136.4	Male	42	20.1	0	0	0
		CC-BAC	198.4	Male	48	29.3	0	0	0
		CC-BAC	35.2	Male	48	28.1	0	0	0
		CC-BAC	66.5	Male	65	25.1	0	0	0
		CC-BAC	40.1	Male	37	32	0	0	0
		CC-BAC	61.6	Male	46	23.9	0	0	0
		CC-BAC	106.8	Male	69	16.3	0	0	0
		CC-BAC	39	Male	67	29.1	0	0	0
		CC-BAC	98.2	Female	72	33.1	1	0	0
		CC-BAC	212.5	Male	57	22.7	1	0	0
		CC-BAC	64.6	Female	86	23.1	1	0	0
		CC-BAC	90.5	Female	62	33.4	1	0	0
		CC-BAC	77.6	Male	61	26.1	0	0	0
		CC-BAC	246.5	Male	54	24.9	1	0	0
		CC-BAC	86.9	Male	54	33.2	1	0	0
		CC-BAC	33.1	Male	57	19.8	0	0	0
		CC-BAC	157.4	Male	49	20.4	0	0	0
		CC-BAC	76.3	Male	69	28.9	0	0	0
		CC-BAC	34.8	Male	70	23.9	1	0	0
		CC-BAC	276.2	Male	45	29.4	1	0	0
		CC-BAC	62.3	Female	29	32.1	0	0	0
		CC-BAC	49.2	Male	70	24.1	1	0	0
		CC-BAC	109.4	Male	60	28.5	1	0	0
		CC-BAC	32.5	Male	61	25.8	0	0	0
		CC-BAC	110.3	Female	71	29.7	1	0	0
		CC-BAC	42.2	Male	63	28.3	0	0	0
		CC-BAC	38.4	Female	73	21	1	0	0
		CC-BAC	136.8	Male	70	32.1	1	0	0
		CC-BAC	49.8	Male	39	26.3	0	0	0
		CC-BAC	59.4	Male	64	24.2	1	0	0
		CC-BAC	97.2	Male	29	31.5	0	0	0
		CC-BAC	105.8	Female	60	32	1	0	0
		CC-BAC	71.7	Female	69	34.4	0	0	0
		CC-BAC	144.7	Male	47	38.5	1	0	0
		CC-BAC	51	Male	67	26.2	1	0	0
		CC-BAC	30.8	Male	57	30.8	1	0	0
		CC-BAC	58.9	Female	50	27.7	1	0	0
		CC-BAC	142	Female	72	28.8	1	0	0
		CC-BAC	152.2	Male	68	20.2	0	0	0
		CC-BAC	62.6	Male	54	22.4	0	0	0
		CC-BAC	123	Male	86	21.3	1	0	0
		CC-BAC	183.9	Female	81	26.2	1	0	0
		R-BAC	221.6	Male	59	35.864	1	0	1
		R-BAC	50	Male	76	22.7254	1	0	1
		R-BAC	82.8	Male	46	28.1824	0	0	1
		R-BAC	51.3	Male	53	30.1867	1	0	1
		R-BAC	58.9	Male	56	28.8634	1	0	1
		R-BAC	191.5	Male	47	22.5959	0	0	1
		R-BAC	77.6	Male	69	32.4584	1	0	1
		R-BAC	18.9	Female	43	48.448	1	0	1
		R-BAC	74.6	Female	31	28.3037	0	0	1
