# Supplementary material for: Anti-inflammatory therapy with nebulized dornase alfa for severe COVID-19 pneumonia: a randomized unblinded trial
Source: eLife. 2024 Jul 16;12:RP87030. doi: 10.7554/eLife.87030 (PMC11251720; doi:10.7554/eLife.87030)
Supplement: Figure 2—source data 1. [file elife-87030-fig2-data1.xlsx]

## Sheet: 2A
Fig. 2A
	CRP (mg.L
	Survived	Died	Outcome (S=0, D=1)
	483.4		0
	150.9		0
	21.3		0
	30.5		0
	145.9		0
	30		0
	80.7		0
	224		0
	22.1		0
	81.1		0
	114.9		0
	240.8		0
	162.1		0
	161		0
	185		0
	132.7		0
	127.6		0
	131.7		0
	159.3		0
	107.8		0
	203		0
	156.4		0
	115.7		0
	77.1		0
	123.4		0
	190.4		0
	262.2		0
	322.4		0
	148.2		0
	140.2		0
	77.5		0
	123.2		0
	41.9		0
	19.2		0
	193.8		0
	22.5		0
	16.3		0
	28.8		0
	28.4		0
	48.8		0
	133.6		0
	48.3		0
	106.6		0
	62		0
	292.4		0
	18.7		0
	12		0
	548.7		0
	152.5		0
	224.9		0
	45.3		0
	109.8		0
	25.5		0
	71.6		0
	500.9		0
	184.4		0
	16.8		0
	39.5		0
	103.1		0
	163.8		0
	240.7		0
	218.1		0
	96.3		0
	302		0
	104.9		0
	321.7		0
	41.5		0
	18.4		0
	19.3		0
	15.6		0
	33.9		0
	113.3		0
	184.6		0
	44.2		0
	181.2		0
	21.3		0
	24.4		0
	160.4		0
	295.7		0
	68		0
	52.9		0
	182.4		0
	157.2		0
	65.3		0
	90.3		0
	40.1		0
	83.3		0
	47.1		0
	225		0
	60.9		0
	100.6		0
	148.8		0
	2.8		0
	2.5		0
	4.7		0
	17.6		0
	4.2		0
	17.6		0
	25.9		0
	147.7		0
	122.8		0
	255.9		0
	129.1		0
	43.2		0
	116.1		0
	152.7		0
	33		0
	54.3		0
	90.2		0
	124.4		0
	79.3		0
	11.3		0
	54.3		0
	92.9		0
	31.2		0
	20.6		0
	67.8		0
	7		0
	20.6		0
	100.7		0
	47.4		0
	10.1		0
	7.6		0
	24.9		0
	2.4		0
	13		0
	42.5		0
	202.8		0
	49.9		0
	143.9		0
	110		0
	76.2		0
	61		0
	65.4		0
	85.9		0
	66.8		0
	34.4		0
	56.1		0
	123.4		0
	137.1		0
	40.1		0
	91.9		0
	29.4		0
	102.2		0
	54.2		0
	67.7		0
	48.5		0
	59		0
	24.2		0
	43.7		0
	19.4		0
	209.5		0
	160.6		0
	75.5		0
	45.6		0
	148.7		0
	237.9		0
	162.4		0
	68.2		0
	104.5		0
	25.9		0
	37.8		0
	241.5		0
	44.8		0
	132.1		0
	341.5		0
	138.1		0
	86.8		0
	47.9		0
	47.9		0
			0
	45.6		0
	49.8		0
	256.9		0
	60.6		0
	56.9		0
	67.4		0
	199.3		0
	48		0
	29.6		0
	35.6		0
	88.8		0
	30.6		0
	68.7		0
	58.4		0
	89.3		0
	192.2		0
	271.7		0
	25.1		0
	201.2		0
	18.7		0
	84.3		0
	22.4		0
	10.8		0
	8.9		0
			0
	22.4		0
	32.9		0
	38.6		0
	25.4		0
	6.6		0
	11.2		0
	18.2		0
	22.1		0
	9.1		0
	13.7		0
	5.2		0
	103		0
	84.8		0
	32		0
	21.7		0
	34.2		0
	61		0
	2.3		0
	15.6		0
	42.9		0
	6.2		0
	69.4		0
	6.8		0
	33.3		0
	121.4		0
	25.4		0
	81.7		0
	5		0
	26.8		0
	82.2		0
	53.4		0
	9.5		0
	55.4		0
	12.6		0
	9.4		0
	4.6		0
	306		0
	39.5		0
	344.5		0
	109.7		0
	83.8		0
	55.7		0
	12.5		0
	93.4		0
	74.1		0
	26.4		0
	156		0
	182.2		0
	220.4		0
	54.7		0
	141		0
	290.1		0
	179.5		0
	64.2		0
	22.1		0
	54		0
	60		0
	26.8		0
	54.2		0
	214.4		0
	215.9		0
	44.2		0
	27		0
	47.8		0
	317.2		0
	96.8		0
	296.8		0
	415.2		0
	478.3		0
	314.3		0
	98.1		0
	309.2		0
	103.7		0
	322.7		0
	222.3		0
	292.4		0
	63.9		0
	156.7		0
	46		0
	24.8		0
	15.9		0
	12.2		0
	180.7		0
	34.7		0
	76.9		0
	52.1		0
	168.3		0
	32.6		0
	29.5		0
	99.4		0
	13.8		0
	25.7		0
	116		0
	49.6		0
	14.6		0
	13.9		0
	12.8		0
	20.8		0
	73.6		0
	416.7		0
	411.4		0
	103.1		0
	25.5		0
	116.3		0
	12.5		0
	216.4		0
	140.8		0
	180.6		0
	241.8		0
	153.1		0
	438.9		0
	135.2		0
	137.8		0
	224.8		0
	224.4		0
	321.1		0
	149.6		0
	157.5		0
	230.7		0
	295.9		0
	177.4		0
	169.4		0
	194.8		0
	200.3		0
	219.6		0
	291.1		0
	148.8		0
	238.3		0
	211.8		0
	178.2		0
	86.3		0
	59.4		0
	106.7		0
	96.4		0
	108.5		0
	103.9		0
	324.8		0
	157		0
	22.3		0
	213.7		0
	207.2		0
	177.6		0
	83.7		0
	97.7		0
	60.2		0
	70.7		0
	74.7		0
	120		0
	193.7		0
	270.7		0
	62.1		0
	29.7		0
	19		0
	15		0
	57		0
	54.6		0
	24.9		0
	418		0
	88.9		0
	249.7		0
	274.8		0
	262.4		0
	283.3		0
	268.5		0
	56.1		0
	148.8		0
	54.3		0
	230.8		0
	292.7		0
	125.3		0
	220.3		0
	269.1		0
	46.3		0
	10.1		0
	35.8		0
	43.5		0
	30.2		0
	43.3		0
	8.5		0
	24.5		0
	12		0
		120.3	1
		317.2	1
		151.1	1
		170.3	1
		161.6	1
		91.4	1
		108.1	1
		69.3	1
		135.1	1
		132.2	1
		61.5	1
		56.6	1
		59	1
		181.8	1
		53.4	1
		201.8	1
		117.9	1
		402	1
		171.5	1
		255.1	1
		146.8	1
		416.1	1
		330.8	1
		116.9	1
		209.7	1
		60.7	1
		89.5	1
		43.7	1
		150.9	1
		43.5	1
		108	1
		81.9	1
		89.5	1
		103.6	1
		139	1
		74	1
		250.8	1
		104.2	1
		82.5	1
		126.3	1
		180.9	1
		37.4	1
		13.5	1
		11.4	1
		41	1
		79.1	1
		29.8	1
		19.9	1
		51.7	1
		376	1
		269.4	1
		21.2	1
		122	1
		115.3	1
		47.6	1
		164.4	1
		122.7	1
		217	1
		303.2	1
		203	1
		422.3	1
		89.6	1
		117.1	1
		66.2	1
		323.5	1
		138.3	1
		340	1
		249.8	1
		177.3	1
		266.8	1
		249.8	1
		149.8	1
		418.3	1
		63.1	1
		78	1
		418.3	1
		292.4	1
		313	1
		78	1
		44.4	1
		22	1
		320.6	1
		84.4	1
		84.4	1
		145.6	1
		157.5	1
		69.2	1
		265.3	1

## Sheet: 2B
		Fig. 2B
			avg CRP/ patient	Outcome
			18.6727	0
			21.2333	0
			24.725	0
			33.95	0
			44.325	0
			47.525	0
			47.7	0
			53.0571	0
			54.5091	0
			54.8083	0
			59.7833	0
			75.6333	0
			76.4444	0
			80.05	0
			82.7667	100
			83.3	0
			95.75	100
			103.6	0
			105.243	0
			106.692	100
			108.22	100
			112.433	0
			115.1	100
			117.2	0
			118.327	0
			118.725	0
			123.589	0
			126.99	0
			127.62	100
			129	100
			130.41	0
			132.575	0
			138.433	100
			143.754	0
			148.533	0
			149.8	100
			159.85	100
			159.97	0
			168.94	0
			169.6	100
			172.6	0
			180.917	0
			202.06	100
			203.277	100
			209.385	100
			210.48	0
			213.857	100
			235.925	100
			237.3	100
			249.114	100
			265.3	100
			402	100

## Sheet: 2C
		Survival (left panel)						Numbers at risk (right panel)
		Days hospitalized	Group 1	Group 2	Group 3	Avr CRP		Days hospitalized	Group 1	Group 2	Group 3
		115	0			19*		0	17	25	10
		72	0			21*		9			10
		42	0			25*		15			9
		43	0			34*		16		25
		42	0			44*		17	17
		109	0			48*		21			8
		17	0			48*		24		23	7
		49	0			53*		25		22
		73	0			55*		28			6
		52	0			55*		32		21
		96	0			60*		33	15	20	5
		33	0			76*		36			4
		101	0			76*		41		19
		137	0			80*		42	14
		74	1			83*		43	11	18
		17	0			83*		44		17
		42	1			96*		47		16
		112		0		104*		48		15
		83		0		105*		49	10
		104		1		107*		50		14
		24		1		108*		52	9
		87		0		112*		55		11
		16		1		115*		61		10
		61		0		117*		65		9
		50		0		118*		66		8
		55		0		119*		72	8		3
		65		0		124*		73	7
		47		0		127*		74	6
		92		1		128*		75		7
		43		1		129*		83		6
		44		0		130*		85			2
		50		0		133*		87		5
		75		1		138*		92		4
		162		0		144*		96	5
		41		0		149*		101	4
		33		1		150*		104		3
		16		1		160*		109	3
		50		0		160*		112		2
		66		0		169*		115	2
		48		1		170*		137	1
		32		0		173*		162		1
		25		0		181*		222			1
		21			1	202*
		222			1	203*
		33			1	209*
		85			0	210*
		24			1	214*
		28			1	236*
		36			1	237*
		72			1	249*
		15			1	265*
		9			1	402*
