# Supplementary material for: Anti-inflammatory therapy with nebulized dornase alfa for severe COVID-19 pneumonia: a randomized unblinded trial
Source: eLife. 2024 Jul 16;12:RP87030. doi: 10.7554/eLife.87030 (PMC11251720; doi:10.7554/eLife.87030)
Supplement: Figure 3—figure supplement 1—source data 1. [file elife-87030-fig3-figsupp1-data1.xlsx]

## Sheet: S3A
		Fig. S3A	CRP traces per patient
			CC-BAC	CC-BAC	CC-BAC	CC-BAC	CC-BAC	CC-BAC	CC-BAC	CC-BAC	CC-BAC	CC-BAC	CC-BAC	CC-BAC	CC-BAC	CC-BAC	CC-BAC	CC-BAC	CC-BAC	CC-BAC	CC-BAC	CC-BAC	CC-BAC	CC-BAC	CC-BAC	CC-BAC	CC-BAC	CC-BAC	CC-BAC	CC-BAC	CC-BAC	CC-BAC	CC-BAC	CC-BAC	CC-BAC	CC-BAC	CC-BAC	CC-BAC	CC-BAC	CC-BAC	CC-BAC	CC-BAC	CC-BAC	CC-BAC	CC-BAC	CC-BAC	CC-BAC	CC-BAC	CC-BAC
		hours	1	2	3	4	5	6	7	8	9	10	11	12	13	14	15	16	17	18	19	20	21	22	23	24	25	26	27	28	29	30	31	32	33	34	35	36	37	38	39	40	41	42	43	44	45	46	47
		0
		21.1667	86.9
		71.8833	79.8
		93.4667	80.1
		117.517	90
		142.6	128
		166.183	152.6
		23.35		16.8
		46.8		8.7
		71.0667		5.5
		95.4		3.7
		19.7			167.7
		43.7			100.2
		67.7			83
		93.35			143.7
		117.6			134.2
		141.433			56.4
		164.7			18.5
		50.5333				8.5
		73.3				3.8
		49.4667					182.8
		24.9333						83.1
		48.4167						46.4
		70.7						37.7
		95.7667						26.2
		143.217						15.7
		166.75						12.9
		25.5							50.2
		69.5167							79.7
		24.5833								29.4
		48.2167								37.6
		23.7833									29.1
		46.3										22.5
		71.3										141.2
		94.9167										151.7
		118.833										60.1
		1.18333											49.5
		6.6											35
		19.1											21.8
		43.1											9.7
		69.35											5.5
		13.65												102.6
		67.35												26.2
		90.25												24.8
		22.75													135
		46.6													120.5
		69.6													177.9
		94.6													313.7
		118.467													190.3
		142.6													176.6
		166.6													340.2
		46.7333														120.4
		96.5833														64
		119.75														43.9
		145.117														27.6
		169.733														22.2
		22.2															37.1
		44.35															19.6
		120.55															39
		144.233															36.5
		47.0833																21.8
		48.1167																	46.7
		73.55																	28.7
		25.15																		101.1
		47.9667																		49.9
		24																			57.9
		84.3833																			16.2
		124.233																			15.9
		172.2																			6.7
		51.05																				39.1
		76.2																				11.6
		24.95																					16
		26.9																						39.5
		96.85																						10
		20.65																							19.4
		18.15																								167.7
		22.5167																								223.2
		24.5167																								224.4
		39.45																								296.7
		63.45																								112.3
		87.45																								57.6
		111.45																								241.7
		133.75																								337.5
		159.45																								191.2
		23.4667																									63.5
		141.767																									80.7
		166.217																									55.4
		23.0833																										18.7
		93.8333																										18.8
		113.2																										8.1
		4.23333																											85.5
		93.6167																											48.2
		168.7																											52.7
		48.6167																												59.7
		72.5333																												43.6
		24.05																													50.4
		46.9																													77.9
		71.4333																													53.6
		95.9167																													35.5
		118.95																													16.9
		142.867																													16
		168.75																													11.2
		56.4833																														51.9
		72.3																														30.8
		121.383																														9.8
		145.717																														5.8
		170.383																														4.6
		43.3333																															27.1
		78.6167																															47.5
		102.017																															35.6
		149.933																															12.6
		18.95																																101.6
		41.9333																																95.6
		66.9167																																119
		92																																110.2
		115.5																																170.3
		140.6																																156.7
		161.45																																171.7
		20.7333																																	121.5
		46.4667																																	80.9
		69.8333																																	34.9
		94.3333																																	80
		119.333																																	173
		140.033																																	57.6
		166.333																																	29.4
		24.1667																																		21.3
		48.5667																																		61
		71.95																																		22.3
		120.283																																		8.6
		149.367																																		7.7
		19.0667																																			226.3
		48.3833																																			226.6
		68.1833																																			209.2
		69.3667																																				63.3
		118.683																																				35.6
		18.5333																																					19.3
		48.9																																					8.9
		145.667																																					12.5
		23.3667																																						118.7
		45.3167																																						33.7
		71.0167																																						14.8
		93.5167																																						57.8
		25.1																																							31.2
		10.0833																																								33.7
		31.7																																								65.1
		56.2167																																								89.9
		61.9																																								114.4
		74.6833																																								131.2
		98.6833																																								71.1
		122.683																																								26.5
		145.683																																								13
		169.933																																								7.7
		16.4167																																									81.8
		40.25																																									48.8
		86.75																																									16.4
		127.817																																									71.8
		154.317																																									89.7
		19.8333																																										55.3
		23.9667																																										52.8
		119.067																																										114.1
		143.117																																										86.2
		24.7333																																											45.1
		72.5667																																											11.4
		96.0333																																											16.6
		119.883																																											9
		144.05																																											5.3
		21.5833																																												20.4
		69.2167																																												9.9
		89.45																																												10.5
		141.067																																												11.1
		24.6333																																													37.4
		43.1167																																													121.6
		66.8667																																													222
		23.7833																																														54.6
		49.7833																																														43.6
		167.883																																														22.7
		14.15																																															30.9
		61.8333																																															9.4
		24.7167
		61.0667
		22.8333
		44.9167
		48.7167
		172.333
		21.3833
		45.45
		71.4833
		94.9
		141.217
		154.75
		29.5
		48.95
		66.2333
		92.5667
		114.233
		138.233
		162.233
		24.0333
		70.8
		20.45
		27.2167
		44.2333
		120.667
		143.5
		28.5833
		16.15
		21.8
		44
		46.1333
		62.4667
		83.4667
		25.3
		48.0667
		72.25
		95.95
		120.133
		144.95
		168.533
		22.0667
		71.7833
		95.9
		9.08333
		56.25
		24.1
		40.5
		64.4
		93.9667
		29.0667
		50.4
		70.9333
		92.2333
		119.417
		131.15
		144.267
		167.467
		25.9167
		47.3833
		95.05
		143.517
		20.6333
		44.5
		94.8333
		117.617
		26.4
		49.25
		49.45
		21.3833
		45.6833
		68.2833
		25.0167
		47.5667
		48.2833
		96.4
		143.617
		20.7167
		45.3833
		68.8167
		92.6
		116.733
		141.467
		164.467
		20.05
		19.1333
		26.4333
		47.5667
		76.7167
		101.717
		14.2833
		17.6833
		41.85
		48.3667
		65.2333
		91.2333
		94.7833
		114.233
		138.233
		162.733
		168.183
		20.4833
		44.3
		45.1833
		70.1333
		93.8833
		116.283
		118.633
		24.1833
		48.3333
		71.35
		73.6
		97.8333
		121.183
		121.217
		167.2
		21.6333
		45.7167
		69.8833
		71.7833
		25.1167
		51.8833
		4.65
		26.8
		47.8333
		22.1
		24.6333
		45.6
		101.017
		21.0333
		68.4667
		92.15
		116.317
		141.883
		164.367
		164.483
		20.6833
		68.45
		116.3
		139.233
		164.367
		21.3667
		41.3333
		65.3333
		89.3333
		136.4
		160.333
		14.1167
		40.15
		63.15
		87.2667
		111.15
		135.65
		158.267
		22.15
		45
		117.133
		47.1667
		45.3833
		47.4667
		53.85
		61.2
		89.2833
		113.283
		135.6
		160.483
		3.81667
		15.0333
		43.8333
		54.6667
		67.9833
		92.6667
		115.167
		140.167
		163.667
		171.417
		45.4
		44.8167
		23.2667
		45.5833
		69.5167
		22.0667
		45.5667
		70.3667
		92.5833
		93.3333
		117.217
		0.116667
		45.3333
		67.35
		117.433
		138.417
		158.533
		160.233
		24.6333
		69.9
		20
		43.0667
		67.5833
		90.75
		90.8667
		17.0833
		41.0833
		44.1667
		22.8333
		43.5833
		67.5833
		91.5833
		143.75
		23.8
		49.0167
		20.8333
		44.3167
		68.5167
		94.0833
		117.067
		142.117
		165.25
		24.4333
		39.1
		60.9833
		87.5333
		95.9333
		111.967
		19.6333
		43.5833
[truncated: 52 more columns]

## Sheet: S3B
				crp
			hours	T-BAC	R-BAC+DA
			1.18333	49.5
			3.81667	58
			4.23333	85.5
			4.65	47.1
			6.6	35
			9.08333	83
			10.0833	33.7
			13.65	102.6
			14.15	30.9
			15.0333	65.6
			16.15	130
			16.4167	81.8
			18.15	167.7
			18.5333	19.3
			18.95	101.6
			19.0667	226.3
			19.1	21.8
			19.7	167.7
			19.8333	55.3
			20.05	42.4
			20.45	16.5
			20.65	19.4
			20.7333	121.5
			21.0333	41.1
			21.1667	86.9
			21.3833	74.7
			21.5833	20.4
			21.8	136
			22.0667	51.5
			22.2	37.1
			22.5167	223.2
			22.75	135
			22.8333	46.4
			23.0833	18.7
			23.35	16.8
			23.3667	118.7
			23.4667	63.5
			23.7833	29.1
			23.7833	54.6
			23.8	21.9
			23.9667	52.8
			24	57.9
			24.0333	38.9
			24.05	50.4
			24.1	88.7
			24.1667	21.3
			24.5167	224.4
			24.5833	29.4
			24.6333	37.4
			24.7167	24.5
			24.7333	45.1
			24.9333	83.1
			24.95	16
			25.1	31.2
			25.15	101.1
			25.3	90.7
			25.5	50.2
			26.4333	33.6
			26.8	31.3
			26.9	39.5
			27.2167	15.2
			28.5833	16.7
			29.0667	267.6
			29.5	52
			31.7	65.1
			39.45	296.7
			40.25	48.8
			40.5	58.3
			41.9333	95.6
			43.1	9.7
			43.1167	121.6
			43.3333	27.1
			43.7	100.2
			43.8333	63.9
			44	220.6
			44.1667	5.5
			44.2333	10.8
			44.35	19.6
			44.9167	31.7
			45.3167	33.7
			45.3833	146.2
			45.45	33.6
			46.1333	227.8
			46.3	22.5
			46.4667	80.9
			46.6	120.5
			46.7333	120.4
			46.8	8.7
			46.9	77.9
			47.0833	21.8
			47.4667	164.9
			47.5667	16
			47.8333	20.3
			47.9667	49.9
			48.0667	125
			48.1167	46.7
			48.2167	37.6
			48.3833	226.6
			48.4167	46.4
			48.5667	61
			48.6167	59.7
			48.7167	22.7
			48.9	8.9
			48.95	25.6
			49.0167	7.5
			49.4667	182.8
			49.7833	43.6
			50.4	190
			50.5333	8.5
			51.05	39.1
			53.85	133.7
			54.6667	59.9
			56.2167	89.9
			56.25	29.6
			56.4833	51.9
			61.0667	52
			61.2	97.2
			61.8333	9.4
			61.9	114.4
			62.4667	284.4
			63.45	112.3
			64.4	32.7
			66.2333	15.9
			66.8667	222
			66.9167	119
			67.35	26.2
			67.7	83
			67.9833	59.2
			68.1833	209.2
			68.4667	31.1
			69.2167	9.9
			69.35	5.5
			69.3667	63.3
			69.5167	79.7
			69.6	177.9
			69.8333	34.9
			70.7	37.7
			70.8	55.1
			70.9333	91.8
			71.0167	14.8
			71.0667	5.5
			71.3	141.2
			71.4333	53.6
			71.4833	17
			71.7833	10.4
			71.8833	79.8
			71.95	22.3
			72.25	118.7
			72.3	30.8
			72.5333	43.6
			72.5667	11.4
			73.3	3.8
			73.55	28.7
			74.6833	131.2
			76.2	11.6
			76.7167	9.5
			78.6167	47.5
			83.4667	239.6
			84.3833	16.2
			86.75	16.4
			87.45	57.6
			89.2833	59.9
			89.45	10.5
			90.25	24.8
			92	110.2
			92.15	25.9
			92.2333	104.7
			92.5667	12.2
			92.6667	67.7
			93.35	143.7
			93.4667	80.1
			93.5167	57.8
			93.6167	48.2
			93.8333	18.8
			93.9667	22.1
			94.3333	80
			94.6	313.7
			94.9	9.6
			94.9167	151.7
			95.4	3.7
			95.7667	26.2
			95.9	6.5
			95.9167	35.5
			95.95	122.1
			96.0333	16.6
			96.5833	64
			96.85	10
			98.6833	71.1
			101.717	5.3
			102.017	35.6
			111.45	241.7
			113.2	8.1
			113.283	92.4
			114.233	13.4
			115.167	43.6
			115.5	170.3
			116.317	54.5
			117.517	90
			117.6	134.2
			118.467	190.3
			118.683	35.6
			118.833	60.1
			118.95	16.9
			119.067	114.1
			119.333	173
			119.417	252
			119.75	43.9
			119.883	9
			120.133	144.2
			120.283	8.6
			120.55	39
			120.667	3
			121.383	9.8
			122.683	26.5
			124.233	15.9
			127.817	71.8
			131.15	256.8
			133.75	337.5
			135.6	468.4
			138.233	6.7
			140.033	57.6
			140.167	18.8
			140.6	156.7
			141.067	11.1
			141.217	3.2
			141.433	56.4
			141.767	80.7
			141.883	40.1
			142.6	128
			142.6	176.6
			142.867	16
			143.117	86.2
			143.217	15.7
			143.5	1.8
			144.05	5.3
			144.233	36.5
			144.267	269.8
			144.95	159.7
			145.117	27.6
			145.667	12.5
			145.683	13
			145.717	5.8
			149.367	7.7
			149.933	12.6
			154.317	89.7
			154.75	2.8
			159.45	191.2
			160.483	336.6
			161.45	171.7
			162.233	4.9
			163.667	11.3
			164.367	18.5
			164.483	20.6
			164.7	18.5
			166.183	152.6
			166.217	55.4
			166.333	29.4
			166.6	340.2
			166.75	12.9
			167.467	215.3
			167.883	22.7
			168.533	162.2
			168.7	52.7
			168.75	11.2
			169.733	22.2
			169.933	7.7
			170.383	4.6
			171.417	6.4
			172.2	6.7
			172.333	1.5
			0.116667		117
			14.1167		100.3
			14.2833		120.2
			17.0833		120.5
			17.6833		94.3
			19.1333		106.5
			19.6333		57.8
			20		79.7
			20.4833		84.2
			20.6333		28.9
			20.6833		29.9
			20.7167		82.2
			20.8333		45.5
			21.3667		70.2
			21.3833		41.9
			21.6333		58.4
			22.0667		20.6
			22.1		48.6
			22.15		15.6
			22.8333		41.5
			23.2667		42.6
			24.1833		103.7
			24.4333		57.4
			24.6333		40.3
			24.6333		48.4
			25.0167		35.1
			25.1167		29.2
			25.9167		39
			26.4		144.9
			39.1		34.8
			40.15		45.6
			41.0833		53
			41.3333		57.5
			41.85		65.4
			43.0667		53.1
			43.5833		24.9
			43.5833		24.4
			44.3		37.9
			44.3167		22.4
			44.5		14.9
			44.8167		32.5
			45		11.7
			45.1833		36.6
			45.3333		100.4
			45.3833		57.8
			45.4		20
			45.5667		10.5
			45.5833		20.7
			45.6		17.9
			45.6833		16.6
			45.7167		49.4
			47.1667		8.3
			47.3833		50.8
			47.5667		27
			48.2833		30.4
			48.3333		44.8
			48.3667		91.4
			49.25		77.1
			49.45		77.4
			51.8833		13.2
			60.9833		21.2
			63.15		24
			65.2333		99.7
			65.3333		48
			67.35		130.4
			67.5833		34.6
			67.5833		13.8
			68.2833		10.2
			68.45		10.7
			68.5167		12.2
			68.8167		35.9
			69.5167		12.9
			69.8833		29.8
			69.9		16.7
			70.1333		17.1
			70.3667		6.2
			71.35		36.1
			71.7833		30.4
			73.6		37.5
			87.2667		24.8
			87.5333		13.9
			89.3333		47
			90.75		27.3
			90.8667		26.5
			91.2333		75.3
			91.5833		6.5
			92.5833		4.2
			92.6		26.1
			93.3333		4.6
			93.8833		11.5
			94.0833		6.6
			94.7833		73.5
			94.8333		5.3
			95.05		89.2
			95.9333		12
			96.4		16.5
			97.8333		48.3
			101.017		20.1
			111.15		20.1
			111.967		8.2
			114.233		60
			116.283		8.5
			116.3		6.1
			116.733		36.6
			117.067		4.2
			117.133		3.8
			117.217		2.6
			117.433		82.5
			117.617		3.2
			118.633		7.9
			121.183		44.4
			121.217		45.3
			135.65		203.5
			136.4		74.1
			138.233		37
			138.417		91.8
			139.233		3.8
			141.467		17.5
			142.117		2.7
			143.517		36
			143.617		7.3
			143.75		1.8
			158.267		336
			158.533		168.9
			160.233		170.1
			160.333		55.4
			162.733		26.9
			164.367		2.5
			164.467		11.1
			165.25		2.1
			167.2		20.4
			168.183		30.8

## Sheet: S3C
	Fig. S3C left	Time to discharge, participants at risk			Fig. S3C right	Time to discharge, participants at risk
	Days	T-BAC	R-BAC-+DA		Days	T-BAC	R-BAC-+DA
	0	9	30		0	69	30
	1	9	30		1	69	30
	2	8	29		2	66	29
	3	6	25		3	61	25
	4	5	20		4	53	20
	5		17		5	44	17
	6		16		6	38	16
	7		10		7	35	10
	8		7		8	30	7
	9		5		9	29	5
	10	4			10	26
	12		4		11	23
	24		3		12	21	4
	28	3			13	20
	31	2			14	19
	35	1	2		18	17
					19	16
					22	15
					23	14
					24	13	3
					28	12
					31	11
					35	10	2
