# Supplementary material for: Anti-inflammatory therapy with nebulized dornase alfa for severe COVID-19 pneumonia: a randomized unblinded trial
Source: eLife. 2024 Jul 16;12:RP87030. doi: 10.7554/eLife.87030 (PMC11251720; doi:10.7554/eLife.87030)
Supplement: Figure 3—source data 1. [file elife-87030-fig3-data1.xlsx]

## Sheet: 3A
	Subject	crpbase	logbasecrp	crp	logcrp	hours	trt	type
CC-BAC	1	96.6	4.57058	86.9	4.46476	21.1667	0	0
CC-BAC	1	96.6	4.57058	79.8	4.37952	71.8833	0	0
CC-BAC	1	96.6	4.57058	80.1	4.38328	93.4667	0	0
CC-BAC	1	96.6	4.57058	90	4.49981	117.517	0	0
CC-BAC	1	96.6	4.57058	128	4.85203	142.6	0	0
CC-BAC	1	96.6	4.57058	152.6	5.02782	166.183	0	0
CC-BAC	1	96.6	4.57058	159.4	5.07142	185.883	0	0
CC-BAC	1	96.6	4.57058	135.6	4.90971	215.75	0	0
CC-BAC	1	96.6	4.57058	166.8	5.1168	224.933	0	0
CC-BAC	1	96.6	4.57058	146.6	4.98771	233.733	0	0
CC-BAC	1	96.6	4.57058	276.9	5.62366	256.433	0	0
CC-BAC	1	96.6	4.57058	128.7	4.85748	280.2	0	0
CC-BAC	1	96.6	4.57058	100.5	4.61016	303.933	0	0
CC-BAC	1	96.6	4.57058	91.1	4.51196	333	0	0
CC-BAC	1	96.6	4.57058	107.1	4.67376	387.35	0	0
CC-BAC	1	96.6	4.57058	97.3	4.5778	406.233	0	0
CC-BAC	1	96.6	4.57058	106	4.66344	426.233	0	0
CC-BAC	1	96.6	4.57058	103.7	4.6415	452.917	0	0
CC-BAC	1	96.6	4.57058	66.1	4.19117	478.05	0	0
CC-BAC	1	96.6	4.57058	46.5	3.83945	505.417	0	0
CC-BAC	1	96.6	4.57058	51.9	3.94932	527.967	0	0
CC-BAC	1	96.6	4.57058	64.7	4.16976	596.5	0	0
CC-BAC	1	96.6	4.57058	66.9	4.2032	626.167	0	0
CC-BAC	1	96.6	4.57058	62.3	4.13196	647.183	0	0
CC-BAC	1	96.6	4.57058	66.3	4.19419	669.233	0	0
CC-BAC	1	96.6	4.57058	71.5	4.2697	694.333	0	0
CC-BAC	1	96.6	4.57058	70.6	4.25703	718.067	0	0
CC-BAC	1	96.6	4.57058	65.2	4.17746	740.983	0	0
CC-BAC	1	96.6	4.57058	75.6	4.32546	761.75	0	0
CC-BAC	1	96.6	4.57058	69.8	4.24563	769.567	0	0
CC-BAC	1	96.6	4.57058	71.3	4.2669	791.583	0	0
CC-BAC	1	96.6	4.57058	23.9	3.17388	836.583	0	0
CC-BAC	1	96.6	4.57058	25.3	3.2308	840.967	0	0
CC-BAC	2	35.7	3.57515	16.8	2.82138	23.35	0	0
CC-BAC	2	35.7	3.57515	8.7	2.16332	46.8	0	0
CC-BAC	2	35.7	3.57515	5.5	1.70475	71.0667	0	0
CC-BAC	2	35.7	3.57515	3.7	1.30833	95.4	0	0
CC-BAC	3	336.4	5.8183	167.7	5.12218	19.7	0	0
CC-BAC	3	336.4	5.8183	100.2	4.60717	43.7	0	0
CC-BAC	3	336.4	5.8183	83	4.41884	67.7	0	0
CC-BAC	3	336.4	5.8183	143.7	4.96773	93.35	0	0
CC-BAC	3	336.4	5.8183	134.2	4.89933	117.6	0	0
CC-BAC	3	336.4	5.8183	56.4	4.03247	141.433	0	0
CC-BAC	3	336.4	5.8183	18.5	2.91777	164.7	0	0
CC-BAC	3	336.4	5.8183	14.3	2.66026	188.7	0	0
CC-BAC	3	336.4	5.8183	8.8	2.17475	212.867	0	0
CC-BAC	3	336.4	5.8183	13.4	2.59525	265.85	0	0
CC-BAC	3	336.4	5.8183	15.8	2.76001	290.833	0	0
CC-BAC	3	336.4	5.8183	13.7	2.6174	313.467	0	0
CC-BAC	3	336.4	5.8183	11.8	2.4681	338.267	0	0
CC-BAC	3	336.4	5.8183	10.1	2.31254	408.1	0	0
CC-BAC	3	336.4	5.8183	11.1	2.40695	432.383	0	0
CC-BAC	4	39.1	3.66612	8.5	2.14007	50.5333	0	0
CC-BAC	4	39.1	3.66612	3.8	1.335	73.3	0	0
CC-BAC	5	73.4	4.29592	182.8	5.20839	49.4667	0	0
CC-BAC	6	201.8	5.30728	83.1	4.42004	24.9333	0	0
CC-BAC	6	201.8	5.30728	46.4	3.8373	48.4167	0	0
CC-BAC	6	201.8	5.30728	37.7	3.62966	70.7	0	0
CC-BAC	6	201.8	5.30728	26.2	3.26576	95.7667	0	0
CC-BAC	6	201.8	5.30728	15.7	2.75366	143.217	0	0
CC-BAC	6	201.8	5.30728	12.9	2.55723	166.75	0	0
CC-BAC	6	201.8	5.30728	9.6	2.26176	192.4	0	0
CC-BAC	6	201.8	5.30728	8	2.07944	215.467	0	0
CC-BAC	6	201.8	5.30728	27.1	3.29953	239.033	0	0
CC-BAC	6	201.8	5.30728	35.5	3.56953	285.233	0	0
CC-BAC	6	201.8	5.30728	19.9	2.99072	308.75	0	0
CC-BAC	6	201.8	5.30728	16.8	2.82138	312.967	0	0
CC-BAC	6	201.8	5.30728	179.2	5.1885	415.083	0	0
CC-BAC	6	201.8	5.30728	164.5	5.10291	459.967	0	0
CC-BAC	6	201.8	5.30728	33.5	3.51155	551.433	0	0
CC-BAC	6	201.8	5.30728	33.2	3.50255	551.433	0	0
CC-BAC	6	201.8	5.30728	17.6	2.8679	574.55	0	0
CC-BAC	6	201.8	5.30728	10.5	2.35138	600.4	0	0
CC-BAC	6	201.8	5.30728	5.7	1.74047	648.767	0	0
CC-BAC	6	201.8	5.30728	2.1	0.741937	767.467	0	0
CC-BAC	6	201.8	5.30728	0.9	-0.105361	840.067	0	0
CC-BAC	7	31.4	3.44681	50.2	3.91602	25.5	0	0
CC-BAC	7	31.4	3.44681	79.7	4.37827	69.5167	0	0
CC-BAC	8	43.8	3.77963	29.4	3.38099	24.5833	0	0
CC-BAC	8	43.8	3.77963	37.6	3.627	48.2167	0	0
CC-BAC	9	60.2	4.09767	29.1	3.37074	23.7833	0	0
CC-BAC	10	75.3	4.32148	22.5	3.11352	46.3	0	0
CC-BAC	10	75.3	4.32148	141.2	4.95018	71.3	0	0
CC-BAC	10	75.3	4.32148	151.7	5.0219	94.9167	0	0
CC-BAC	10	75.3	4.32148	60.1	4.09601	118.833	0	0
CC-BAC	10	75.3	4.32148	25.4	3.23475	193.05	0	0
CC-BAC	10	75.3	4.32148	52.1	3.95316	243.483	0	0
CC-BAC	11	50.4	3.91999	49.5	3.90197	1.18333	0	0
CC-BAC	11	50.4	3.91999	35	3.55535	6.6	0	0
CC-BAC	11	50.4	3.91999	21.8	3.08191	19.1	0	0
CC-BAC	11	50.4	3.91999	9.7	2.27213	43.1	0	0
CC-BAC	11	50.4	3.91999	5.5	1.70475	69.35	0	0
CC-BAC	1	143.7	4.96773	102.6	4.63084	13.65	0	0
CC-BAC	12	143.7	4.96773	26.2	3.26576	67.35	0	0
CC-BAC	12	143.7	4.96773	24.8	3.21084	90.25	0	0
CC-BAC	13	197.5	5.28574	135	4.90527	22.75	0	0
CC-BAC	13	197.5	5.28574	120.5	4.79165	46.6	0	0
CC-BAC	13	197.5	5.28574	177.9	5.18122	69.6	0	0
CC-BAC	13	197.5	5.28574	313.7	5.74844	94.6	0	0
CC-BAC	13	197.5	5.28574	190.3	5.2486	118.467	0	0
CC-BAC	13	197.5	5.28574	176.6	5.17389	142.6	0	0
CC-BAC	13	197.5	5.28574	340.2	5.82953	166.6	0	0
CC-BAC	14	126.3	4.83866	120.4	4.79082	46.7333	0	0
CC-BAC	14	126.3	4.83866	64	4.15888	96.5833	0	0
CC-BAC	14	126.3	4.83866	43.9	3.78191	119.75	0	0
CC-BAC	14	126.3	4.83866	27.6	3.31782	145.117	0	0
CC-BAC	14	126.3	4.83866	22.2	3.10009	169.733	0	0
CC-BAC	14	126.3	4.83866	11.6	2.45101	220.817	0	0
CC-BAC	14	126.3	4.83866	8.9	2.18605	239.317	0	0
CC-BAC	14	126.3	4.83866	9.1	2.20827	315.033	0	0
CC-BAC	15	68.1	4.22098	37.1	3.61362	22.2	0	0
CC-BAC	15	68.1	4.22098	19.6	2.97553	44.35	0	0
CC-BAC	15	68.1	4.22098	39	3.66356	120.55	0	0
CC-BAC	15	68.1	4.22098	36.5	3.59731	144.233	0	0
CC-BAC	15	68.1	4.22098	26.9	3.29213	192.233	0	0
CC-BAC	16	70.9	4.26127	21.8	3.08191	47.0833	0	0
CC-BAC	17	88	4.47734	46.7	3.84374	48.1167	0	0
CC-BAC	17	88	4.47734	28.7	3.3569	73.55	0	0
CC-BAC	18	249	5.51745	101.1	4.61611	25.15	0	0
CC-BAC	18	249	5.51745	49.9	3.91002	47.9667	0	0
CC-BAC	19	136.4	4.91559	57.9	4.05872	24	0	0
CC-BAC	19	136.4	4.91559	16.2	2.78501	84.3833	0	0
CC-BAC	19	136.4	4.91559	15.9	2.76632	124.233	0	0
CC-BAC	19	136.4	4.91559	6.7	1.90211	172.2	0	0
CC-BAC	19	136.4	4.91559	6.8	1.91692	208.05	0	0
CC-BAC	19	136.4	4.91559	5.6	1.72277	220.033	0	0
CC-BAC	19	136.4	4.91559	4.8	1.56862	243.917	0	0
CC-BAC	19	136.4	4.91559	12.6	2.5337	269.35	0	0
CC-BAC	19	136.4	4.91559	23.7	3.16548	292.267	0	0
CC-BAC	19	136.4	4.91559	15.2	2.7213	317.8	0	0
CC-BAC	19	136.4	4.91559	22	3.09104	339.9	0	0
CC-BAC	19	136.4	4.91559	15.6	2.74727	364.75	0	0
CC-BAC	19	136.4	4.91559	8.4	2.12823	388.467	0	0
CC-BAC	19	136.4	4.91559	17.6	2.8679	414.183	0	0
CC-BAC	19	136.4	4.91559	87.5	4.47164	438.1	0	0
CC-BAC	19	136.4	4.91559	72.2	4.27944	460.617	0	0
CC-BAC	19	136.4	4.91559	32.3	3.47507	484.183	0	0
CC-BAC	19	136.4	4.91559	23.4	3.15274	508.317	0	0
CC-BAC	19	136.4	4.91559	19.3	2.96011	531.6	0	0
CC-BAC	19	136.4	4.91559	21.6	3.07269	556.167	0	0
CC-BAC	19	136.4	4.91559	72.6	4.28496	652.117	0	0
CC-BAC	19	136.4	4.91559	152.1	5.02454	676.6	0	0
CC-BAC	19	136.4	4.91559	156.8	5.05497	695.55	0	0
CC-BAC	19	136.4	4.91559	162.8	5.09252	701.867	0	0
CC-BAC	19	136.4	4.91559	170.9	5.14108	723.5	0	0
CC-BAC	19	136.4	4.91559	142.2	4.95723	748.783	0	0
CC-BAC	19	136.4	4.91559	146.2	4.98498	749.267	0	0
CC-BAC	19	136.4	4.91559	83.4	4.42365	809.833	0	0
CC-BAC	19	136.4	4.91559	72.2	4.27944	816.45	0	0
CC-BAC	19	136.4	4.91559	51.9	3.94932	843.667	0	0
CC-BAC	20	136.4	4.91559	53.4	3.97781	849.933	0	0
CC-BAC	21	198.4	5.29029	39.1	3.66612	51.05	0	0
CC-BAC	21	198.4	5.29029	11.6	2.45101	76.2	0	0
CC-BAC	22	35.2	3.56105	16	2.77259	24.95	0	0
CC-BAC	23	66.5	4.1972	39.5	3.6763	26.9	0	0
CC-BAC	23	66.5	4.1972	10	2.30259	96.85	0	0
CC-BAC	24	40.1	3.69138	19.4	2.96527	20.65	0	0
CC-BAC	25	61.6	4.12066	167.7	5.12218	18.15	0	0
CC-BAC	25	61.6	4.12066	223.2	5.40807	22.5167	0	0
CC-BAC	25	61.6	4.12066	224.4	5.41343	24.5167	0	0
CC-BAC	25	61.6	4.12066	296.7	5.69272	39.45	0	0
CC-BAC	25	61.6	4.12066	112.3	4.72117	63.45	0	0
CC-BAC	25	61.6	4.12066	57.6	4.05352	87.45	0	0
CC-BAC	25	61.6	4.12066	241.7	5.4877	111.45	0	0
CC-BAC	25	61.6	4.12066	337.5	5.82157	133.75	0	0
CC-BAC	25	61.6	4.12066	191.2	5.25332	159.45	0	0
CC-BAC	25	61.6	4.12066	126.5	4.84024	183.55	0	0
CC-BAC	25	61.6	4.12066	102.5	4.62986	230.45	0	0
CC-BAC	25	61.6	4.12066	141	4.94876	253.45	0	0
CC-BAC	25	61.6	4.12066	109.6	4.69684	278.283	0	0
CC-BAC	25	61.6	4.12066	75.7	4.32678	302.717	0	0
CC-BAC	25	61.6	4.12066	92.5	4.52721	324.95	0	0
CC-BAC	25	61.6	4.12066	85.9	4.45318	350.45	0	0
CC-BAC	25	61.6	4.12066	97.9	4.58395	375.45	0	0
CC-BAC	25	61.6	4.12066	70.8	4.25986	400.45	0	0
CC-BAC	25	61.6	4.12066	55	4.00733	423.45	0	0
CC-BAC	25	61.6	4.12066	67.8	4.21656	445.45	0	0
CC-BAC	25	61.6	4.12066	64.1	4.16044	470.45	0	0
CC-BAC	25	61.6	4.12066	66.4	4.1957	494.95	0	0
CC-BAC	25	61.6	4.12066	66.8	4.2017	518.95	0	0
CC-BAC	25	61.6	4.12066	73	4.29046	541.633	0	0
CC-BAC	25	61.6	4.12066	91.7	4.51852	566.45	0	0
CC-BAC	25	61.6	4.12066	93.7	4.5401	590.45	0	0
CC-BAC	25	61.6	4.12066	121.1	4.79662	614.45	0	0
CC-BAC	25	61.6	4.12066	124.8	4.82671	638.95	0	0
CC-BAC	25	61.6	4.12066	87.1	4.46706	662.45	0	0
CC-BAC	25	61.6	4.12066	99.4	4.59915	686.583	0	0
CC-BAC	25	61.6	4.12066	100.8	4.61314	707.45	0	0
CC-BAC	25	61.6	4.12066	85.9	4.45318	732.217	0	0
CC-BAC	25	61.6	4.12066	53.3	3.97594	757.9	0	0
CC-BAC	25	61.6	4.12066	66.9	4.2032	779.617	0	0
CC-BAC	25	61.6	4.12066	88.6	4.48413	805.7	0	0
CC-BAC	26	106.8	4.67096	63.5	4.15104	23.4667	0	0
CC-BAC	26	106.8	4.67096	80.7	4.39074	141.767	0	0
CC-BAC	26	106.8	4.67096	55.4	4.01458	166.217	0	0
CC-BAC	26	106.8	4.67096	24.7	3.2068	214.667	0	0
CC-BAC	26	106.8	4.67096	7.7	2.04122	261.6	0	0
CC-BAC	26	106.8	4.67096	4.6	1.52606	287.1	0	0
CC-BAC	26	106.8	4.67096	47.8	3.86703	337.217	0	0
CC-BAC	26	106.8	4.67096	79.1	4.37071	360.917	0	0
CC-BAC	26	106.8	4.67096	54.3	3.99452	382.917	0	0
CC-BAC	26	106.8	4.67096	35	3.55535	407.2	0	0
CC-BAC	26	106.8	4.67096	31.6	3.45316	430.367	0	0
CC-BAC	26	106.8	4.67096	37.1	3.61362	454.767	0	0
CC-BAC	26	106.8	4.67096	36	3.58352	478.617	0	0
CC-BAC	26	106.8	4.67096	41.1	3.71601	503.283	0	0
CC-BAC	26	106.8	4.67096	54.3	3.99452	549.35	0	0
CC-BAC	26	106.8	4.67096	43.1	3.76352	598.333	0	0
CC-BAC	26	106.8	4.67096	30.1	3.40453	626.667	0	0
CC-BAC	26	106.8	4.67096	43.7	3.77735	695.033	0	0
CC-BAC	26	106.8	4.67096	31.6	3.45316	718.183	0	0
CC-BAC	26	106.8	4.67096	28.7	3.3569	748.333	0	0
CC-BAC	27	39	3.66356	18.7	2.92852	23.0833	0	0
CC-BAC	27	39	3.66356	18.8	2.93386	93.8333	0	0
CC-BAC	27	39	3.66356	8.1	2.09186	113.2	0	0
CC-BAC	28	98.2	4.58701	85.5	4.44852	4.23333	0	0
CC-BAC	28	98.2	4.58701	48.2	3.87536	93.6167	0	0
CC-BAC	28	98.2	4.58701	52.7	3.96462	168.7	0	0
CC-BAC	28	98.2	4.58701	13.4	2.59525	219.5	0	0
CC-BAC	28	98.2	4.58701	21.2	3.054	335.717	0	0
CC-BAC	28	98.2	4.58701	29.5	3.38439	359.75	0	0
CC-BAC	28	98.2	4.58701	32	3.46574	406.967	0	0
CC-BAC	28	98.2	4.58701	33.7	3.5175	431.183	0	0
CC-BAC	28	98.2	4.58701	33.2	3.50255	454.367	0	0
CC-BAC	28	98.2	4.58701	26.4	3.27336	479.6	0	0
CC-BAC	28	98.2	4.58701	17.9	2.8848	551.233	0	0
CC-BAC	29	212.5	5.35894	59.7	4.08933	48.6167	0	0
CC-BAC	29	212.5	5.35894	43.6	3.77506	72.5333	0	0
CC-BAC	30	64.6	4.16821	50.4	3.91999	24.05	0	0
CC-BAC	30	64.6	4.16821	77.9	4.35543	46.9	0	0
CC-BAC	30	64.6	4.16821	53.6	3.98155	71.4333	0	0
CC-BAC	30	64.6	4.16821	35.5	3.56953	95.9167	0	0
CC-BAC	30	64.6	4.16821	16.9	2.82731	118.95	0	0
CC-BAC	30	64.6	4.16821	16	2.77259	142.867	0	0
CC-BAC	30	64.6	4.16821	11.2	2.41591	168.75	0	0
CC-BAC	30	64.6	4.16821	5	1.60944	193.25	0	0
CC-BAC	30	64.6	4.16821	6.8	1.91692	239.717	0	0
CC-BAC	30	64.6	4.16821	6.7	1.90211	264.2	0	0
CC-BAC	31	90.5	4.50535	51.9	3.94932	56.4833	0	0
CC-BAC	31	90.5	4.50535	30.8	3.42751	72.3	0	0
CC-BAC	31	90.5	4.50535	9.8	2.28238	121.383	0	0
CC-BAC	31	90.5	4.50535	5.8	1.75786	145.717	0	0
CC-BAC	31	90.5	4.50535	4.6	1.52606	170.383	0	0
CC-BAC	31	90.5	4.50535	5.5	1.70475	194.383	0	0
CC-BAC	32	77.6	4.35157	27.1	3.29953	43.3333	0	0
CC-BAC	32	77.6	4.35157	47.5	3.86073	78.6167	0	0
CC-BAC	32	77.6	4.35157	35.6	3.57235	102.017	0	0
CC-BAC	32	77.6	4.35157	12.6	2.5337	149.933	0	0
CC-BAC	33	246.5	5.50736	101.6	4.62104	18.95	0	0
CC-BAC	33	246.5	5.50736	95.6	4.56017	41.9333	0	0
CC-BAC	33	246.5	5.50736	119	4.77912	66.9167	0	0
CC-BAC	33	246.5	5.50736	110.2	4.7023	92	0	0
CC-BAC	33	246.5	5.50736	170.3	5.13756	115.5	0	0
CC-BAC	33	246.5	5.50736	156.7	5.05433	140.6	0	0
CC-BAC	33	246.5	5.50736	171.7	5.14575	161.45	0	0
CC-BAC	33	246.5	5.50736	221.9	5.40223	185.183	0	0
CC-BAC	33	246.5	5.50736	380.9	5.94254	208.933	0	0
CC-BAC	33	246.5	5.50736	352.6	5.86533	232.867	0	0
CC-BAC	33	246.5	5.50736	295.3	5.68799	257.733	0	0
CC-BAC	33	246.5	5.50736	287	5.65948	281.35	0	0
CC-BAC	33	246.5	5.50736	244.5	5.49922	305.35	0	0
CC-BAC	33	246.5	5.50736	262.7	5.57101	326	0	0
CC-BAC	33	246.5	5.50736	272.8	5.60874	352.883	0	0
CC-BAC	33	246.5	5.50736	243.1	5.49347	377.967	0	0
CC-BAC	33	246.5	5.50736	335.6	5.81592	399.35	0	0
CC-BAC	33	246.5	5.50736	499.2	6.21301	424.2	0	0
CC-BAC	33	246.5	5.50736	466.1	6.1444	449.867	0	0
CC-BAC	33	246.5	5.50736	429.3	6.06216	473.2	0	0
CC-BAC	33	246.5	5.50736	352.8	5.8659	496.517	0	0
CC-BAC	33	246.5	5.50736	270.6	5.60064	521.35	0	0
CC-BAC	33	246.5	5.50736	273.2	5.6102	545.35	0	0
CC-BAC	33	246.5	5.50736	327.1	5.79027	566.967	0	0
CC-BAC	33	246.5	5.50736	284.5	5.65073	592.317	0	0
CC-BAC	33	246.5	5.50736	278.7	5.63014	615.983	0	0
CC-BAC	33	246.5	5.50736	242.4	5.49059	639.217	0	0
CC-BAC	33	246.5	5.50736	144.9	4.97604	663.133	0	0
CC-BAC	33	246.5	5.50736	99.7	4.60217	687.083	0	0
CC-BAC	33	246.5	5.50736	169.4	5.13226	713.35	0	0
CC-BAC	33	246.5	5.50736	224	5.41165	735.35	0	0
CC-BAC	33	246.5	5.50736	283.5	5.64721	761.35	0	0
CC-BAC	33	246.5	5.50736	359.6	5.88499	785.85	0	0
CC-BAC	33	246.5	5.50736	364.8	5.89935	809.85	0	0
CC-BAC	33	246.5	5.50736	286.4	5.65739	833.717	0	0
CC-BAC	34	86.9	4.46476	121.5	4.79991	20.7333	0	0
CC-BAC	34	86.9	4.46476	80.9	4.39321	46.4667	0	0
CC-BAC	34	86.9	4.46476	34.9	3.55249	69.8333	0	0
CC-BAC	34	86.9	4.46476	80	4.38203	94.3333	0	0
CC-BAC	34	86.9	4.46476	173	5.15329	119.333	0	0
CC-BAC	34	86.9	4.46476	57.6	4.05352	140.033	0	0
CC-BAC	34	86.9	4.46476	29.4	3.38099	166.333	0	0
CC-BAC	34	86.9	4.46476	14.9	2.70136	189.333	0	0
CC-BAC	34	86.9	4.46476	9.1	2.20827	214.333	0	0
CC-BAC	34	86.9	4.46476	6.3	1.84055	243.9	0	0
CC-BAC	34	86.9	4.46476	5	1.60944	267.117	0	0
CC-BAC	34	86.9	4.46476	4.2	1.43508	292.833	0	0
CC-BAC	35	33.1	3.49953	21.3	3.05871	24.1667	0	0
CC-BAC	35	33.1	3.49953	61	4.11087	48.5667	0	0
CC-BAC	35	33.1	3.49953	22.3	3.10459	71.95	0	0
CC-BAC	35	33.1	3.49953	8.6	2.15176	120.283	0	0
CC-BAC	35	33.1	3.49953	7.7	2.04122	149.367	0	0
CC-BAC	35	33.1	3.49953	6.5	1.8718	192.267	0	0
CC-BAC	35	33.1	3.49953	100.1	4.60617	217.4	0	0
CC-BAC	35	33.1	3.49953	70.6	4.25703	288.017	0	0
CC-BAC	35	33.1	3.49953	53.6	3.98155	312.783	0	0
CC-BAC	35	33.1	3.49953	17	2.83321	384.55	0	0
CC-BAC	35	33.1	3.49953	11.6	2.45101	408.033	0	0
CC-BAC	35	33.1	3.49953	10.9	2.38876	411.683	0	0
CC-BAC	35	33.1	3.49953	96.8	4.57265	481.283	0	0
CC-BAC	35	33.1	3.49953	66.2	4.19268	528.583	0	0
CC-BAC	35	33.1	3.49953	109	4.69135	649.6	0	0
CC-BAC	35	33.1	3.49953	101.4	4.61907	673.517	0	0
CC-BAC	35	33.1	3.49953	75.7	4.32678	697.217	0	0
CC-BAC	35	33.1	3.49953	18.3	2.9069	816.233	0	0
CC-BAC	36	157.4	5.05879	226.3	5.42186	19.0667	0	0
CC-BAC	36	157.4	5.05879	226.6	5.42319	48.3833	0	0
CC-BAC	36	157.4	5.05879	209.2	5.34329	68.1833	0	0
CC-BAC	37	76.3	4.33467	63.3	4.14789	69.3667	0	0
CC-BAC	37	76.3	4.33467	35.6	3.57235	118.683	0	0
CC-BAC	38	34.8	3.54962	19.3	2.96011	18.5333	0	0
CC-BAC	38	34.8	3.54962	8.9	2.18605	48.9	0	0
CC-BAC	38	34.8	3.54962	12.5	2.52573	145.667	0	0
CC-BAC	38	34.8	3.54962	6.1	1.80829	191.8	0	0
CC-BAC	39	276.2	5.62113	118.7	4.7766	23.3667	0	0
CC-BAC	39	276.2	5.62113	33.7	3.5175	45.3167	0	0
CC-BAC	39	276.2	5.62113	14.8	2.69463	71.0167	0	0
CC-BAC	39	276.2	5.62113	57.8	4.05699	93.5167	0	0
CC-BAC	40	62.3	4.13196	31.2	3.44042	25.1	0	0
CC-BAC	40	49.2	3.89589	33.7	3.5175	10.0833	0	0
CC-BAC	40	49.2	3.89589	65.1	4.17592	31.7	0	0
CC-BAC	40	49.2	3.89589	89.9	4.4987	56.2167	0	0
CC-BAC	40	49.2	3.89589	114.4	4.7397	61.9	0	0
CC-BAC	40	49.2	3.89589	131.2	4.87672	74.6833	0	0
CC-BAC	40	49.2	3.89589	71.1	4.26409	98.6833	0	0
CC-BAC	40	49.2	3.89589	26.5	3.27714	122.683	0	0
CC-BAC	40	49.2	3.89589	13	2.56495	145.683	0	0
CC-BAC	40	49.2	3.89589	7.7	2.04122	169.933	0	0
CC-BAC	40	49.2	3.89589	4.8	1.56862	195.7	0	0
CC-BAC	40	49.2	3.89589	3.1	1.1314	219.683	0	0
CC-BAC	40	49.2	3.89589	2.5	0.916291	242.683	0	0
CC-BAC	40	49.2	3.89589	1.8	0.587787	267.367	0	0
CC-BAC	40	49.2	3.89589	1.5	0.405465	291.183	0	0
CC-BAC	40	49.2	3.89589	3.9	1.36098	302.333	0	0
CC-BAC	40	49.2	3.89589	4.2	1.43508	315.017	0	0
CC-BAC	40	49.2	3.89589	2.1	0.741937	339.683	0	0
CC-BAC	40	49.2	3.89589	1	0	362.683	0	0
CC-BAC	40	49.2	3.89589	0.7	-0.356675	387.333	0	0
CC-BAC	40	49.2	3.89589	6.4	1.8563	458.05	0	0
CC-BAC	40	49.2	3.89589	10	2.30259	481.683	0	0
CC-BAC	40	49.2	3.89589	105.8	4.66155	490.317	0	0
CC-BAC	40	49.2	3.89589	114.8	4.74319	507.183	0	0
CC-BAC	40	49.2	3.89589	227.1	5.42539	530.083	0	0
CC-BAC	40	49.2	3.89589	267.6	5.58949	554.683	0	0
CC-BAC	40	49.2	3.89589	277.2	5.62474	578.683	0	0
CC-BAC	41	109.4	4.69501	81.8	4.40428	16.4167	0	0
CC-BAC	41	109.4	4.69501	48.8	3.88773	40.25	0	0
CC-BAC	41	109.4	4.69501	16.4	2.79728	86.75	0	0
CC-BAC	41	109.4	4.69501	71.8	4.27388	127.817	0	0
CC-BAC	41	109.4	4.69501	89.7	4.49647	154.317	0	0
CC-BAC	41	109.4	4.69501	274.6	5.61532	189.517	0	0
CC-BAC	41	109.4	4.69501	348.8	5.8545	203.85	0	0
CC-BAC	41	109.4	4.69501	178.2	5.18291	226.85	0	0
CC-BAC	41	109.4	4.69501	43.4	3.77046	256.85	0	0
CC-BAC	41	109.4	4.69501	27.9	3.32863	272.1	0	0
CC-BAC	41	109.4	4.69501	105.5	4.65871	298.85	0	0
CC-BAC	41	109.4	4.69501	328.7	5.79515	322.85	0	0
CC-BAC	41	109.4	4.69501	339.8	5.82836	343.733	0	0
CC-BAC	41	109.4	4.69501	205.3	5.32447	368.85	0	0
CC-BAC	41	109.4	4.69501	119.1	4.77996	394.35	0	0
CC-BAC	41	109.4	4.69501	89.8	4.49758	419.733	0	0
CC-BAC	41	109.4	4.69501	80.4	4.38701	442.85	0	0
CC-BAC	41	109.4	4.69501	56.2	4.02892	466.85	0	0
CC-BAC	41	109.4	4.69501	50.7	3.92593	490.85	0	0
CC-BAC	41	109.4	4.69501	74.8	4.31482	513.55	0	0
CC-BAC	41	109.4	4.69501	89.6	4.49536	538.917	0	0
CC-BAC	41	109.4	4.69501	81.8	4.40428	561.85	0	0
CC-BAC	41	109.4	4.69501	58.6	4.07073	586.65	0	0
CC-BAC	41	109.4	4.69501	33.8	3.52046	609.85	0	0
CC-BAC	41	109.4	4.69501	25.5	3.23868	633.25	0	0
CC-BAC	41	109.4	4.69501	25.2	3.22684	655.783	0	0
CC-BAC	41	109.4	4.69501	20.5	3.02042	682.85	0	0
CC-BAC	41	109.4	4.69501	32.5	3.48124	706.85	0	0
CC-BAC	41	109.4	4.69501	16.8	2.82138	730.85	0	0
CC-BAC	41	109.4	4.69501	9.6	2.26176	751.733	0	0
CC-BAC	41	109.4	4.69501	8.7	2.16332	775.817	0	0
CC-BAC	41	109.4	4.69501	6.3	1.84055	799.283	0	0
CC-BAC	41	109.4	4.69501	4.5	1.50408	823.683	0	0
CC-BAC	41	109.4	4.69501	2.9	1.06471	847.483	0	0
CC-BAC	42	32.5	3.48124	55.3	4.01277	19.8333	0	0
CC-BAC	42	32.5	3.48124	52.8	3.96651	23.9667	0	0
CC-BAC	42	32.5	3.48124	114.1	4.73708	119.067	0	0
CC-BAC	42	32.5	3.48124	86.2	4.45667	143.117	0	0
CC-BAC	42	32.5	3.48124	21.3	3.05871	191.583	0	0
CC-BAC	42	32.5	3.48124	52.4	3.95891	264	0	0
CC-BAC	43	110.3	4.7032	45.1	3.80888	24.7333	0	0
CC-BAC	43	110.3	4.7032	11.4	2.43361	72.5667	0	0
CC-BAC	43	110.3	4.7032	16.6	2.8094	96.0333	0	0
CC-BAC	43	110.3	4.7032	9	2.19722	119.883	0	0
CC-BAC	43	110.3	4.7032	5.3	1.66771	144.05	0	0
CC-BAC	44	42.2	3.74242	20.4	3.01553	21.5833	0	0
CC-BAC	44	42.2	3.74242	9.9	2.29253	69.2167	0	0
CC-BAC	44	42.2	3.74242	10.5	2.35138	89.45	0	0
CC-BAC	44	42.2	3.74242	11.1	2.40695	141.067	0	0
CC-BAC	44	42.2	3.74242	5.1	1.62924	212.1	0	0
CC-BAC	44	42.2	3.74242	23.6	3.16125	307.483	0	0
CC-BAC	45	38.4	3.64806	37.4	3.62167	24.6333	0	0
CC-BAC	45	38.4	3.64806	121.6	4.80074	43.1167	0	0
CC-BAC	45	38.4	3.64806	222	5.40268	66.8667	0	0
CC-BAC	46	136.8	4.91852	54.6	4.00003	23.7833	0	0
CC-BAC	46	136.8	4.91852	43.6	3.77506	49.7833	0	0
CC-BAC	46	136.8	4.91852	22.7	3.12236	167.883	0	0
CC-BAC	47	49.8	3.90801	30.9	3.43076	14.15	0	0
CC-BAC	47	49.8	3.90801	9.4	2.24071	61.8333	0	0
CC-BAC	48	59.4	4.08429	24.5	3.19867	24.7167	0	0
CC-BAC	48	59.4	4.08429	52	3.95124	61.0667	0	0
CC-BAC	49	97.2	4.57677	46.4	3.8373	22.8333	0	0
CC-BAC	49	97.2	4.57677	31.7	3.45632	44.9167	0	0
CC-BAC	50	105.8	4.66155	22.7	3.12236	48.7167	0	0
CC-BAC	50	105.8	4.66155	1.5	0.405465	172.333	0	0
CC-BAC	51	71.7	4.27249	74.7	4.31348	21.3833	0	0
CC-BAC	51	71.7	4.27249	33.6	3.51453	45.45	0	0
CC-BAC	51	71.7	4.27249	17	2.83321	71.4833	0	0
CC-BAC	51	71.7	4.27249	9.6	2.26176	94.9	0	0
CC-BAC	51	71.7	4.27249	3.2	1.16315	141.217	0	0
CC-BAC	51	71.7	4.27249	2.8	1.02962	154.75	0	0
CC-BAC	51	71.7	4.27249	2.5	0.916291	214.433	0	0
CC-BAC	51	71.7	4.27249	2.5	0.916291	238.4	0	0
CC-BAC	51	71.7	4.27249	1	0	285.583	0	0
CC-BAC	51	71.7	4.27249	0.8	-0.223144	334.383	0	0
CC-BAC	51	71.7	4.27249	1.3	0.262364	525.65	0	0
CC-BAC	52	144.7	4.97466	52	3.95124	29.5	0	0
CC-BAC	52	144.7	4.97466	25.6	3.24259	48.95	0	0
CC-BAC	52	144.7	4.97466	15.9	2.76632	66.2333	0	0
CC-BAC	52	144.7	4.97466	12.2	2.50144	92.5667	0	0
CC-BAC	52	144.7	4.97466	13.4	2.59525	114.233	0	0
CC-BAC	52	144.7	4.97466	6.7	1.90211	138.233	0	0
CC-BAC	52	144.7	4.97466	4.9	1.58924	162.233	0	0
CC-BAC	52	144.7	4.97466	7.9	2.06686	184.883	0	0
CC-BAC	52	144.7	4.97466	15.9	2.76632	210.233	0	0
CC-BAC	52	144.7	4.97466	40.7	3.70623	234.233	0	0
CC-BAC	52	144.7	4.97466	75.2	4.32015	259.733	0	0
CC-BAC	52	144.7	4.97466	145.1	4.97742	283.233	0	0
CC-BAC	52	144.7	4.97466	111.3	4.71223	307.233	0	0
CC-BAC	52	144.7	4.97466	121.8	4.80238	328.233	0	0
CC-BAC	52	144.7	4.97466	70.4	4.25419	354.233	0	0
CC-BAC	52	144.7	4.97466	129	4.85981	378.233	0	0
CC-BAC	52	144.7	4.97466	174.6	5.1625	402.233	0	0
CC-BAC	52	144.7	4.97466	322.7	5.77672	425.983	0	0
CC-BAC	52	144.7	4.97466	321.4	5.77269	449.233	0	0
CC-BAC	52	144.7	4.97466	312.2	5.74364	474.233	0	0
CC-BAC	52	144.7	4.97466	273.9	5.61276	497.333	0	0
CC-BAC	52	144.7	4.97466	218.5	5.38679	522.233	0	0
CC-BAC	52	144.7	4.97466	161.1	5.08203	547.233	0	0
CC-BAC	52	144.7	4.97466	128.8	4.85826	570.317	0	0
CC-BAC	52	144.7	4.97466	90.2	4.50203	594.233	0	0
CC-BAC	52	144.7	4.97466	63.5	4.15104	619.233	0	0
CC-BAC	52	144.7	4.97466	44.5	3.79549	643.233	0	0
CC-BAC	52	144.7	4.97466	34.8	3.54962	667.233	0	0
CC-BAC	52	144.7	4.97466	29.6	3.38777	676.9	0	0
CC-BAC	52	144.7	4.97466	39.1	3.66612	691.233	0	0
CC-BAC	52	144.7	4.97466	51.2	3.93574	714.45	0	0
CC-BAC	52	144.7	4.97466	29.6	3.38777	739.233	0	0
CC-BAC	52	144.7	4.97466	29.2	3.37417	763.233	0	0
CC-BAC	52	144.7	4.97466	27.6	3.31782	783.683	0	0
CC-BAC	52	144.7	4.97466	22.4	3.10906	824.05	0	0
CC-BAC	53	51	3.93183	38.9	3.66099	24.0333	0	0
CC-BAC	53	51	3.93183	55.1	4.00915	70.8	0	0
CC-BAC	54	30.8	3.42751	16.5	2.80336	20.45	0	0
CC-BAC	54	30.8	3.42751	15.2	2.7213	27.2167	0	0
CC-BAC	54	30.8	3.42751	10.8	2.37955	44.2333	0	0
CC-BAC	54	30.8	3.42751	3	1.09861	120.667	0	0
CC-BAC	54	30.8	3.42751	1.8	0.587787	143.5	0	0
CC-BAC	55	58.9	4.07584	16.7	2.81541	28.5833	0	0
CC-BAC	56	142	4.95583	130	4.86753	16.15	0	0
CC-BAC	56	142	4.95583	136	4.91265	21.8	0	0
CC-BAC	56	142	4.95583	220.6	5.39635	44	0	0
CC-BAC	56	142	4.95583	227.8	5.42847	46.1333	0	0
CC-BAC	56	142	4.95583	284.4	5.65038	62.4667	0	0
CC-BAC	56	142	4.95583	239.6	5.47897	83.4667	0	0
CC-BAC	57	152.2	5.0252	90.7	4.50756	25.3	0	0
CC-BAC	57	152.2	5.0252	125	4.82831	48.0667	0	0
CC-BAC	57	152.2	5.0252	118.7	4.7766	72.25	0	0
CC-BAC	57	152.2	5.0252	122.1	4.80484	95.95	0	0
CC-BAC	57	152.2	5.0252	144.2	4.9712	120.133	0	0
CC-BAC	57	152.2	5.0252	159.7	5.0733	144.95	0	0
CC-BAC	57	152.2	5.0252	162.2	5.08883	168.533	0	0
CC-BAC	57	152.2	5.0252	223.6	5.40986	192.383	0	0
CC-BAC	57	152.2	5.0252	241.4	5.48646	237.417	0	0
CC-BAC	57	152.2	5.0252	240	5.48064	240.417	0	0
CC-BAC	57	152.2	5.0252	192.9	5.26217	265.267	0	0
CC-BAC	58	62.6	4.13677	51.5	3.94158	22.0667	0	0
CC-BAC	58	62.6	4.13677	10.4	2.34181	71.7833	0	0
CC-BAC	58	62.6	4.13677	6.5	1.8718	95.9	0	0
CC-BAC	59	123	4.81218	83	4.41884	9.08333	0	0
CC-BAC	59	123	4.81218	29.6	3.38777	56.25	0	0
CC-BAC	60	183.9	5.21439	88.7	4.48526	24.1	0	0
CC-BAC	60	183.9	5.21439	58.3	4.0656	40.5	0	0
CC-BAC	60	183.9	5.21439	32.7	3.48738	64.4	0	0
CC-BAC	60	183.9	5.21439	22.1	3.09558	93.9667	0	0
R-BAC	COV001	221.6	5.40087	267.6	5.58949	29.0667	0	1
R-BAC	COV001	221.6	5.40087	190	5.24702	50.4	0	1
R-BAC	COV001	221.6	5.40087	91.8	4.51961	70.9333	0	1
R-BAC	COV001	221.6	5.40087	104.7	4.6511	92.2333	0	1
R-BAC	COV001	221.6	5.40087	252	5.52943	119.417	0	1
R-BAC	COV001	221.6	5.40087	256.8	5.5483	131.15	0	1
R-BAC	COV001	221.6	5.40087	269.8	5.59768	144.267	0	1
R-BAC	COV001	221.6	5.40087	215.3	5.37203	167.467	0	1
R-BAC	COV001	221.6	5.40087	145.9	4.98292	191.933	0	1
R-BAC	COV001	221.6	5.40087	70.4	4.25419	218	0	1
R-BAC	COV001	221.6	5.40087	92.9	4.53152	266.73	0	1
R-BAC	COV001	221.6	5.40087	34.8	3.54962	287.617	0	1
R-BAC	COV001	221.6	5.40087	62.8	4.13996	384.317	0	1
R-BAC	COV001	221.6	5.40087	108.2	4.68398	456.183	0	1
R-BAC	COV001	221.6	5.40087	72.3	4.28082	480.25	0	1
R-BAC	COV001	221.6	5.40087	140.8	4.94734	524.25	0	1
R-BAC	COV001	221.6	5.40087	262.4	5.56987	547.75	0	1
R-BAC	COV001	221.6	5.40087	203.1	5.3137	571.75	0	1
R-BAC	COV001	221.6	5.40087	160.3	5.07705	599.65	0	1
R-BAC	COV001	221.6	5.40087	104.8	4.65205	647	0	1
R-BAC +DA	COV002	46.5	3.83945	39	3.66356	25.9167	1	1
R-BAC +DA	COV002	46.5	3.83945	50.8	3.9279	47.3833	1	1
R-BAC +DA	COV002	46.5	3.83945	89.2	4.49088	95.05	1	1
R-BAC +DA	COV002	46.5	3.83945	36	3.58352	143.517	1	1
R-BAC +DA	COV003	60.2	4.09767	28.9	3.36384	20.6333	1	1
R-BAC +DA	COV003	60.2	4.09767	14.9	2.70136	44.5	1	1
R-BAC +DA	COV003	60.2	4.09767	5.3	1.66771	94.8333	1	1
R-BAC +DA	COV003	60.2	4.09767	3.2	1.16315	117.617	1	1
R-BAC +DA	COV004	261.5	5.56643	144.9	4.97604	26.4	1	1
R-BAC +DA	COV004	261.5	5.56643	77.1	4.3451	49.25	1	1
R-BAC +DA	COV004	261.5	5.56643	77.4	4.34899	49.45	1	1
R-BAC +DA	COV005	90.5	4.50535	41.9	3.73529	21.3833	1	1
R-BAC +DA	COV005	90.5	4.50535	16.6	2.8094	45.6833	1	1
R-BAC +DA	COV005	90.5	4.50535	10.2	2.32239	68.2833	1	1
R-BAC +DA	COV006	64.3	4.16356	35.1	3.5582	25.0167	1	1
R-BAC +DA	COV006	64.3	4.16356	27	3.29584	47.5667	1	1
R-BAC +DA	COV006	64.3	4.16356	30.4	3.41444	48.2833	1	1
R-BAC +DA	COV006	64.3	4.16356	16.5	2.80336	96.4	1	1
R-BAC +DA	COV006	64.3	4.16356	7.3	1.98787	143.617	1	1
R-BAC +DA	COV007	123.6	4.81705	82.2	4.40916	20.7167	1	1
R-BAC +DA	COV007	123.6	4.81705	57.8	4.05699	45.3833	1	1
R-BAC +DA	COV007	123.6	4.81705	35.9	3.58074	68.8167	1	1
R-BAC +DA	COV007	123.6	4.81705	26.1	3.26194	92.6	1	1
R-BAC +DA	COV007	123.6	4.81705	36.6	3.60005	116.733	1	1
R-BAC +DA	COV007	123.6	4.81705	17.5	2.8622	141.467	1	1
R-BAC +DA	COV007	123.6	4.81705	11.1	2.40695	164.467	1	1
R-BAC +DA	COV007	123.6	4.81705	118.1	4.77153	265.583	1	1
R-BAC	COV008	50	3.91202	42.4	3.74715	20.05	0	1
R-BAC +DA	COV009	166.9	5.11739	106.5	4.66814	19.1333	1	1
R-BAC	COV011	82.8	4.41643	33.6	3.51453	26.4333	0	1
R-BAC	COV011	82.8	4.41643	16	2.77259	47.5667	0	1
R-BAC	COV011	82.8	4.41643	9.5	2.25129	76.7167	0	1
R-BAC	COV011	82.8	4.41643	5.3	1.66771	101.717	0	1
R-BAC +DA	COV012	130.7	4.8729	120.2	4.78916	14.2833	1	1
R-BAC +DA	COV012	130.7	4.8729	94.3	4.54648	17.6833	1	1
R-BAC +DA	COV012	130.7	4.8729	65.4	4.18052	41.85	1	1
R-BAC +DA	COV012	130.7	4.8729	91.4	4.51525	48.3667	1	1
R-BAC +DA	COV012	130.7	4.8729	99.7	4.60217	65.2333	1	1
R-BAC +DA	COV012	130.7	4.8729	75.3	4.32148	91.2333	1	1
R-BAC +DA	COV012	130.7	4.8729	73.5	4.29729	94.7833	1	1
R-BAC +DA	COV012	130.7	4.8729	60	4.09434	114.233	1	1
R-BAC +DA	COV012	130.7	4.8729	37	3.61092	138.233	1	1
R-BAC +DA	COV012	130.7	4.8729	26.9	3.29213	162.733	1	1
R-BAC +DA	COV012	130.7	4.8729	30.8	3.42751	168.183	1	1
R-BAC +DA	COV012	130.7	4.8729	38.5	3.65066	186.767	1	1
R-BAC +DA	COV012	130.7	4.8729	41.9	3.73529	210.733	1	1
R-BAC +DA	COV012	130.7	4.8729	26.3	3.26957	234.233	1	1
R-BAC +DA	COV012	130.7	4.8729	20.5	3.02042	257.233	1	1
R-BAC +DA	COV012	130.7	4.8729	10.2	2.32239	282.233	1	1
R-BAC +DA	COV012	130.7	4.8729	13.6	2.61007	305.983	1	1
R-BAC +DA	COV012	130.7	4.8729	19	2.94444	330.733	1	1
R-BAC +DA	COV012	130.7	4.8729	110	4.70048	383.267	1	1
R-BAC +DA	COV012	130.7	4.8729	144	4.96981	406.483	1	1
R-BAC +DA	COV012	130.7	4.8729	85	4.44265	424.35	1	1
R-BAC +DA	COV012	130.7	4.8729	45	3.80666	449.5	1	1
R-BAC +DA	COV012	130.7	4.8729	29.9	3.39786	473.233	1	1
R-BAC +DA	COV012	130.7	4.8729	18	2.89037	495.85	1	1
R-BAC +DA	COV012	130.7	4.8729	10.3	2.33214	521.267	1	1
R-BAC +DA	COV012	130.7	4.8729	6.6	1.88707	545.167	1	1
R-BAC +DA	COV012	130.7	4.8729	6.5	1.8718	545.233	1	1
R-BAC +DA	COV012	130.7	4.8729	4.9	1.58924	545.233	1	1
R-BAC +DA	COV012	130.7	4.8729	5	1.60944	579.6	1	1
R-BAC +DA	COV012	130.7	4.8729	13.4	2.59525	594.233	1	1
R-BAC +DA	COV012	130.7	4.8729	29.6	3.38777	619.1	1	1
R-BAC +DA	COV012	130.7	4.8729	24.1	3.18221	642.85	1	1
R-BAC +DA	COV012	130.7	4.8729	12.5	2.52573	666.567	1	1
R-BAC +DA	COV012	130.7	4.8729	8.9	2.18605	690.55	1	1
R-BAC +DA	COV012	130.7	4.8729	8.8	2.17475	690.55	1	1
R-BAC +DA	COV012	130.7	4.8729	7.4	2.00148	714.767	1	1
R-BAC +DA	COV012	130.7	4.8729	31.6	3.45316	739.233	1	1
R-BAC +DA	COV012	130.7	4.8729	20.1	3.00072	763.233	1	1
R-BAC +DA	COV012	130.7	4.8729	11.4	2.43361	785.8	1	1
R-BAC +DA	COV012	130.7	4.8729	42.9	3.75887	809.017	1	1
R-BAC +DA	COV012	130.7	4.8729	106.7	4.67002	836.733	1	1
R-BAC +DA	COV013	88	4.47734	84.2	4.43319	20.4833	1	1
R-BAC +DA	COV013	88	4.47734	37.9	3.63495	44.3	1	1
R-BAC +DA	COV013	88	4.47734	36.6	3.60005	45.1833	1	1
R-BAC +DA	COV013	88	4.47734	17.1	2.83908	70.1333	1	1
R-BAC +DA	COV013	88	4.47734	11.5	2.44235	93.8833	1	1
R-BAC +DA	COV013	88	4.47734	8.5	2.14007	116.283	1	1
R-BAC +DA	COV013	88	4.47734	7.9	2.06686	118.633	1	1
R-BAC +DA	COV014	204	5.31812	103.7	4.6415	24.1833	1	1
R-BAC +DA	COV014	204	5.31812	44.8	3.80221	48.3333	1	1
R-BAC +DA	COV014	204	5.31812	36.1	3.58629	71.35	1	1
R-BAC +DA	COV014	204	5.31812	37.5	3.62434	73.6	1	1
R-BAC +DA	COV014	204	5.31812	48.3	3.87743	97.8333	1	1
R-BAC +DA	COV014	204	5.31812	44.4	3.79324	121.183	1	1
R-BAC +DA	COV014	204	5.31812	45.3	3.81331	121.217	1	1
R-BAC +DA	COV014	204	5.31812	20.4	3.01553	167.2	1	1
R-BAC +DA	COV015	78.2	4.35927	58.4	4.06732	21.6333	1	1
R-BAC +DA	COV015	78.2	4.35927	49.4	3.89995	45.7167	1	1
R-BAC +DA	COV015	78.2	4.35927	29.8	3.39451	69.8833	1	1
R-BAC +DA	COV015	78.2	4.35927	30.4	3.41444	71.7833	1	1
R-BAC +DA	COV016	70.9	4.26127	29.2	3.37417	25.1167	1	1
R-BAC +DA	COV016	70.9	4.26127	13.2	2.58022	51.8833	1	1
R-BAC +DA	COV017	51.3	3.93769	47.1	3.85227	4.65	0	1
R-BAC +DA	COV017	51.3	3.93769	31.3	3.44362	26.8	0	1
R-BAC +DA	COV017	51.3	3.93769	20.3	3.01062	47.8333	0	1
R-BAC +DA	COV018	59.7	4.08933	48.6	3.88362	22.1	1	1
R-BAC +DA	COV018	59.7	4.08933	40.3	3.69635	24.6333	1	1
R-BAC +DA	COV018	59.7	4.08933	17.9	2.8848	45.6	1	1
R-BAC +DA	COV018	59.7	4.08933	20.1	3.00072	101.017	1	1
R-BAC	COV019	58.9	4.07584	41.1	3.71601	21.0333	0	1
R-BAC	COV019	58.9	4.07584	31.1	3.43721	68.4667	0	1
R-BAC	COV019	58.9	4.07584	25.9	3.25424	92.15	0	1
R-BAC	COV019	58.9	4.07584	54.5	3.9982	116.317	0	1
R-BAC	COV019	58.9	4.07584	40.1	3.69138	141.883	0	1
R-BAC	COV019	58.9	4.07584	18.5	2.91777	164.367	0	1
R-BAC	COV019	58.9	4.07584	20.6	3.02529	164.483	0	1
R-BAC	COV019	58.9	4.07584	10.6	2.36085	187.45	0	1
R-BAC	COV019	58.9	4.07584	7.2	1.97408	237.033	0	1
R-BAC +DA	COV020	63.5	4.15104	29.9	3.39786	20.6833	1	1
R-BAC +DA	COV020	63.5	4.15104	10.7	2.37024	68.45	1	1
R-BAC +DA	COV020	63.5	4.15104	6.1	1.80829	116.3	1	1
R-BAC +DA	COV020	63.5	4.15104	3.8	1.335	139.233	1	1
R-BAC +DA	COV020	63.5	4.15104	2.5	0.916291	164.367	1	1
R-BAC +DA	COV020	63.5	4.15104	7.1	1.96009	627.817	1	1
R-BAC +DA	COV021	84.6	4.43793	70.2	4.25135	21.3667	1	1
R-BAC +DA	COV021	84.6	4.43793	57.5	4.05178	41.3333	1	1
R-BAC +DA	COV021	84.6	4.43793	48	3.8712	65.3333	1	1
R-BAC +DA	COV021	84.6	4.43793	47	3.85015	89.3333	1	1
R-BAC +DA	COV021	84.6	4.43793	74.1	4.30542	136.4	1	1
R-BAC +DA	COV021	84.6	4.43793	55.4	4.01458	160.333	1	1
R-BAC +DA	COV021	84.6	4.43793	39.8	3.68387	184.833	1	1
R-BAC +DA	COV021	84.6	4.43793	14.5	2.67415	239.167	1	1
R-BAC +DA	COV021	84.6	4.43793	113	4.72739	286.683	1	1
R-BAC +DA	COV022	125.6	4.8331	100.3	4.60817	14.1167	1	1
R-BAC +DA	COV022	125.6	4.8331	45.6	3.81991	40.15	1	1
R-BAC +DA	COV022	125.6	4.8331	24	3.17805	63.15	1	1
R-BAC +DA	COV022	125.6	4.8331	24.8	3.21084	87.2667	1	1
R-BAC +DA	COV022	125.6	4.8331	20.1	3.00072	111.15	1	1
R-BAC +DA	COV022	125.6	4.8331	203.5	5.31567	135.65	1	1
R-BAC +DA	COV022	125.6	4.8331	336	5.81711	158.267	1	1
R-BAC +DA	COV022	125.6	4.8331	254.2	5.53812	195.183	1	1
R-BAC +DA	COV022	125.6	4.8331	364.5	5.89853	208.15	1	1
R-BAC +DA	COV022	125.6	4.8331	518.2	6.25036	232.15	1	1
R-BAC +DA	COV022	125.6	4.8331	492.4	6.19929	254.5	1	1
R-BAC +DA	COV022	125.6	4.8331	315.5	5.75416	279.367	1	1
R-BAC +DA	COV022	125.6	4.8331	251.4	5.52705	303.15	1	1
R-BAC +DA	COV022	125.6	4.8331	161.1	5.08203	326.317	1	1
R-BAC +DA	COV022	125.6	4.8331	128	4.85203	352.15	1	1
R-BAC +DA	COV022	125.6	4.8331	116.5	4.75789	376.733	1	1
R-BAC +DA	COV022	125.6	4.8331	202.6	5.31123	398.85	1	1
R-BAC +DA	COV022	125.6	4.8331	164.9	5.10534	423.15	1	1
R-BAC +DA	COV022	125.6	4.8331	152.9	5.02978	447.733	1	1
R-BAC +DA	COV022	125.6	4.8331	253	5.53339	471.15	1	1
R-BAC +DA	COV022	125.6	4.8331	316.8	5.75827	496.15	1	1
R-BAC +DA	COV022	125.6	4.8331	297.2	5.69441	519.65	1	1
R-BAC +DA	COV022	125.6	4.8331	349.8	5.85736	542.867	1	1
R-BAC +DA	COV022	125.6	4.8331	402.7	5.99819	567.4	1	1
R-BAC +DA	COV023	25.2	3.22684	15.6	2.74727	22.15	1	1
R-BAC +DA	COV023	25.2	3.22684	11.7	2.45959	45	1	1
R-BAC +DA	COV023	25.2	3.22684	3.8	1.335	117.133	1	1
R-BAC +DA	COV024	30.7	3.42426	8.3	2.11626	47.1667	1	1
R-BAC	COV025	191.5	5.25489	146.2	4.98498	45.3833	0	1
R-BAC	COV025	191.5	5.25489	164.9	5.10534	47.4667	0	1
R-BAC	COV025	191.5	5.25489	133.7	4.8956	53.85	0	1
R-BAC	COV025	191.5	5.25489	97.2	4.57677	61.2	0	1
R-BAC	COV025	191.5	5.25489	59.9	4.09268	89.2833	0	1
R-BAC	COV025	191.5	5.25489	92.4	4.52613	113.283	0	1
R-BAC	COV025	191.5	5.25489	468.4	6.14932	135.6	0	1
R-BAC	COV025	191.5	5.25489	336.6	5.8189	160.483	0	1
R-BAC	COV025	191.5	5.25489	217.3	5.38128	184.217	0	1
R-BAC	COV025	191.5	5.25489	287.7	5.66192	207.183	0	1
R-BAC	COV025	191.5	5.25489	394.9	5.97863	233.283	0	1
R-BAC	COV025	191.5	5.25489	226.4	5.4223	257.567	0	1
R-BAC	COV025	191.5	5.25489	101.8	4.62301	280.533	0	1
R-BAC	COV025	191.5	5.25489	347.8	5.85163	304.283	0	1
R-BAC	COV025	191.5	5.25489	442.5	6.09244	328.333	0	1
R-BAC	COV025	191.5	5.25489	523.5	6.26054	353.283	0	1
R-BAC	COV025	191.5	5.25489	516.4	6.24688	375.783	0	1
R-BAC	COV025	191.5	5.25489	337.5	5.82157	399.783	0	1
R-BAC	COV025	191.5	5.25489	163.9	5.09926	424.967	0	1
R-BAC	COV025	191.5	5.25489	97	4.57471	450.083	0	1
R-BAC	COV025	191.5	5.25489	66.9	4.2032	472.283	0	1
R-BAC	COV025	191.5	5.25489	46.9	3.84802	495.45	0	1
R-BAC	COV025	191.5	5.25489	35.6	3.57235	521.283	0	1
R-BAC	COV025	191.5	5.25489	23.8	3.16969	544.283	0	1
R-BAC	COV025	191.5	5.25489	14.3	2.66026	568.283	0	1
R-BAC	COV025	191.5	5.25489	8.7	2.16332	593.1	0	1
R-BAC	COV025	191.5	5.25489	13.8	2.62467	616.8	0	1
R-BAC	COV025	191.5	5.25489	49.5	3.90197	639.283	0	1
R-BAC	COV025	191.5	5.25489	279.5	5.633	663.283	0	1
R-BAC	COV025	191.5	5.25489	273	5.60947	688.817	0	1
R-BAC	COV025	191.5	5.25489	276.6	5.62257	713.283	0	1
R-BAC	COV025	191.5	5.25489	138.7	4.93231	736.667	0	1
R-BAC	COV025	191.5	5.25489	90.8	4.50866	761.783	0	1
R-BAC	COV025	191.5	5.25489	66.7	4.2002	785.283	0	1
R-BAC	COV025	191.5	5.25489	104.5	4.64919	809.2	0	1
R-BAC	COV025	191.5	5.25489	136.7	4.91779	833.15	0	1
R-BAC	COV027	77.6	4.35157	58	4.06044	3.81667	0	1
R-BAC	COV027	77.6	4.35157	65.6	4.18358	15.0333	0	1
R-BAC	COV027	77.6	4.35157	63.9	4.15732	43.8333	0	1
R-BAC	COV027	77.6	4.35157	59.9	4.09268	54.6667	0	1
R-BAC	COV027	77.6	4.35157	59.2	4.08092	67.9833	0	1
R-BAC	COV027	77.6	4.35157	67.7	4.21509	92.6667	0	1
R-BAC	COV027	77.6	4.35157	43.6	3.77506	115.167	0	1
R-BAC	COV027	77.6	4.35157	18.8	2.93386	140.167	0	1
R-BAC	COV027	77.6	4.35157	11.3	2.4248	163.667	0	1
R-BAC	COV027	77.6	4.35157	6.4	1.8563	171.417	0	1
R-BAC	COV027	77.6	4.35157	5.3	1.66771	203.067	0	1
R-BAC	COV027	77.6	4.35157	4	1.38629	214.15	0	1
R-BAC	COV027	77.6	4.35157	2.9	1.06471	235.167	0	1
R-BAC	COV027	77.6	4.35157	2.6	0.955511	260.15	0	1
R-BAC	COV027	77.6	4.35157	2.6	0.955511	284.167	0	1
R-BAC	COV027	77.6	4.35157	2.5	0.916291	313.5	0	1
R-BAC	COV027	77.6	4.35157	2	0.693147	337.05	0	1
R-BAC	COV027	77.6	4.35157	1.2	0.182322	356.283	0	1
R-BAC	COV027	77.6	4.35157	14.4	2.66723	380.95	0	1
R-BAC	COV027	77.6	4.35157	35.9	3.58074	402.667	0	1
R-BAC	COV027	77.6	4.35157	31.2	3.44042	426.667	0	1
R-BAC	COV027	77.6	4.35157	21.9	3.08649	451.2	0	1
R-BAC	COV027	77.6	4.35157	10	2.30259	475.583	0	1
R-BAC	COV027	77.6	4.35157	8.9	2.18605	500.167	0	1
R-BAC	COV027	77.6	4.35157	14.7	2.68785	524.167	0	1
R-BAC	COV027	77.6	4.35157	20.1	3.00072	541.433	0	1
R-BAC	COV027	77.6	4.35157	17.3	2.85071	551.033	0	1
R-BAC	COV027	77.6	4.35157	9.3	2.23001	575.05	0	1
R-BAC	COV027	77.6	4.35157	4.1	1.41099	599.05	0	1
R-BAC	COV027	77.6	4.35157	1.5	0.405465	624.233	0	1
R-BAC	COV027	77.6	4.35157	1.5	0.405465	647.817	0	1
R-BAC	COV027	77.6	4.35157	6.9	1.93152	671	0	1
R-BAC	COV027	77.6	4.35157	13.7	2.6174	694.933	0	1
R-BAC	COV027	77.6	4.35157	36.1	3.58629	718.833	0	1
R-BAC	COV027	77.6	4.35157	87.9	4.4762	743.05	0	1
R-BAC +DA	COV028	106.8	4.67096	20	2.99573	45.4	1	1
R-BAC +DA	COV029	155.3	5.04536	32.5	3.48124	44.8167	1	1
R-BAC +DA	COV030	79.6	4.37701	42.6	3.75185	23.2667	1	1
R-BAC +DA	COV030	79.6	4.37701	20.7	3.03013	45.5833	1	1
R-BAC +DA	COV030	79.6	4.37701	12.9	2.55723	69.5167	1	1
R-BAC +DA	COV031	50.1	3.91402	20.6	3.02529	22.0667	1	1
R-BAC +DA	COV031	50.1	3.91402	10.5	2.35138	45.5667	1	1
R-BAC +DA	COV031	50.1	3.91402	6.2	1.82455	70.3667	1	1
R-BAC +DA	COV031	50.1	3.91402	4.2	1.43508	92.5833	1	1
R-BAC +DA	COV031	50.1	3.91402	4.6	1.52606	93.3333	1	1
R-BAC +DA	COV031	50.1	3.91402	2.6	0.955511	117.217	1	1
R-BAC +DA	COV032	117.8	4.76899	117	4.76217	0.116667	1	1
R-BAC +DA	COV032	117.8	4.76899	100.4	4.60916	45.3333	1	1
R-BAC +DA	COV032	117.8	4.76899	130.4	4.87061	67.35	1	1
R-BAC +DA	COV032	117.8	4.76899	82.5	4.4128	117.433	1	1
R-BAC +DA	COV032	117.8	4.76899	91.8	4.51961	138.417	1	1
R-BAC +DA	COV032	117.8	4.76899	168.9	5.12931	158.533	1	1
R-BAC +DA	COV032	117.8	4.76899	170.1	5.13639	160.233	1	1
R-BAC +DA	COV032	117.8	4.76899	222.1	5.40313	184.717	1	1
R-BAC +DA	COV032	117.8	4.76899	121.4	4.79909	205.717	1	1
R-BAC +DA	COV032	117.8	4.76899	58.5	4.06903	232.217	1	1
R-BAC +DA	COV032	117.8	4.76899	182.8	5.20839	256.217	1	1
R-BAC +DA	COV032	117.8	4.76899	361.9	5.89137	280.217	1	1
R-BAC +DA	COV032	117.8	4.76899	286.9	5.65913	304.717	1	1
R-BAC +DA	COV032	117.8	4.76899	135.3	4.90749	329	1	1
R-BAC +DA	COV032	117.8	4.76899	94.7	4.55071	352.717	1	1
R-BAC +DA	COV032	117.8	4.76899	225	5.4161	377.7	1	1
R-BAC +DA	COV032	117.8	4.76899	268.9	5.59434	400.517	1	1
R-BAC +DA	COV032	117.8	4.76899	268.9	5.59434	424.217	1	1
R-BAC +DA	COV032	117.8	4.76899	412.7	6.02272	449.367	1	1
R-BAC +DA	COV032	117.8	4.76899	374.4	5.92532	473.083	1	1
R-BAC +DA	COV032	117.8	4.76899	229.3	5.43503	497.167	1	1
R-BAC +DA	COV032	117.8	4.76899	257.6	5.55141	521.017	1	1
R-BAC +DA	COV032	117.8	4.76899	211.3	5.35328	545.017	1	1
R-BAC +DA	COV032	117.8	4.76899	253.8	5.53655	570.133	1	1
R-BAC +DA	COV032	117.8	4.76899	241.1	5.48521	592.217	1	1
R-BAC +DA	COV032	117.8	4.76899	183.5	5.21221	616.717	1	1
R-BAC +DA	COV032	117.8	4.76899	153.2	5.03174	640.217	1	1
R-BAC +DA	COV032	117.8	4.76899	145.6	4.98086	662.917	1	1
R-BAC +DA	COV032	117.8	4.76899	288.6	5.66504	687.217	1	1
R-BAC +DA	COV032	117.8	4.76899	262.7	5.57101	711.867	1	1
R-BAC +DA	COV032	117.8	4.76899	198.5	5.29079	736.217	1	1
R-BAC +DA	COV032	117.8	4.76899	239.2	5.4773	760.217	1	1
R-BAC +DA	COV032	117.8	4.76899	276.9	5.62366	784.217	1	1
R-BAC +DA	COV032	117.8	4.76899	243.7	5.49594	809.217	1	1
R-BAC +DA	COV032	117.8	4.76899	183.2	5.21058	833.217	1	1
R-BAC +DA	COV033	84.4	4.43557	48.4	3.8795	24.6333	1	1
R-BAC +DA	COV033	84.4	4.43557	16.7	2.81541	69.9	1	1
R-BAC +DA	COV034	155.9	5.04921	79.7	4.37827	20	1	1
R-BAC +DA	COV034	155.9	5.04921	53.1	3.97218	43.0667	1	1
R-BAC +DA	COV034	155.9	5.04921	34.6	3.54385	67.5833	1	1
R-BAC +DA	COV034	155.9	5.04921	27.3	3.30689	90.75	1	1
R-BAC +DA	COV034	155.9	5.04921	26.5	3.27714	90.8667	1	1
R-BAC +DA	COV035	156.1	5.0505	120.5	4.79165	17.0833	1	1
R-BAC +DA	COV035	156.1	5.0505	53	3.97029	41.0833	1	1
R-BAC	COV036	18.9	2.93916	5.5	1.70475	44.1667	0	1
R-BAC +DA	COV037	64.4	4.16511	41.5	3.72569	22.8333	1	1
R-BAC +DA	COV037	64.4	4.16511	24.9	3.21487	43.5833	1	1
R-BAC +DA	COV037	64.4	4.16511	13.8	2.62467	67.5833	1	1
R-BAC +DA	COV037	64.4	4.16511	6.5	1.8718	91.5833	1	1
R-BAC +DA	COV037	64.4	4.16511	1.8	0.587787	143.75	1	1
R-BAC	COV038	74.6	4.31214	21.9	3.08649	23.8	0	1
R-BAC	COV038	74.6	4.31214	7.5	2.0149	49.0167	0	1
R-BAC +DA	COV039	83.3	4.42245	45.5	3.81771	20.8333	1	1
R-BAC +DA	COV039	83.3	4.42245	22.4	3.10906	44.3167	1	1
R-BAC +DA	COV039	83.3	4.42245	12.2	2.50144	68.5167	1	1
R-BAC +DA	COV039	83.3	4.42245	6.6	1.88707	94.0833	1	1
R-BAC +DA	COV039	83.3	4.42245	4.2	1.43508	117.067	1	1
R-BAC +DA	COV039	83.3	4.42245	2.7	0.993252	142.117	1	1
R-BAC +DA	COV039	83.3	4.42245	2.1	0.741937	165.25	1	1
R-BAC +DA	COV039	83.3	4.42245	1.4	0.336472	188.833	1	1
R-BAC +DA	COV039	83.3	4.42245	1.2	0.182322	213.15	1	1
R-BAC +DA	COV040	108.3	4.68491	57.4	4.05004	24.4333	1	1
R-BAC +DA	COV040	108.3	4.68491	34.8	3.54962	39.1	1	1
R-BAC +DA	COV040	108.3	4.68491	21.2	3.054	60.9833	1	1
R-BAC +DA	COV040	108.3	4.68491	13.9	2.63189	87.5333	1	1
R-BAC +DA	COV040	108.3	4.68491	12	2.48491	95.9333	1	1
R-BAC +DA	COV040	108.3	4.68491	8.2	2.10413	111.967	1	1
R-BAC +DA	COV126	119.4	4.78248	57.8	4.05699	19.6333	1	1
R-BAC +DA	COV126	119.4	4.78248	24.4	3.19458	43.5833	1	1

## Sheet: 3C left
				Fig. 3C left
				Days	R-BAC	R-BAC+DA
				28	1
				1	1
				4	1
				2	1
				10	1
				35	0
				31	1
				2	1
				3	1
				6		1
				6		1
				3		1
				3		1
				7		1
				7		1
				1		1
				35		0
				6		1
				7		1
				3		1
				2		1
				2		1
				8		1
				12		1
				24		0
				6		1
				2		1
				3		1
				3		1
				4		1
				5		1
				35		0
				4		1
				4		1
				6		1
				8		1
				9		1
				6		1
				2		1

## Sheet: Fig 3C right
				Fig. 3C right
					Days	T-BAC	R-BAC+DA
				COV	28	1
				COV	1	1
				COV	4	1
				COV	2	1
				COV	10	1
				COV	35	0
				COV	31	1
				COV	2	1
				COV	3	1
				CC	35	0
				CC	4	1
				CC	18	1
				CC	4	1
				CC	10	0
				CC	35	0
				CC	3	1
				CC	3	1
				CC	2	1
				CC	11	1
				CC	5	1
				CC	7	1
				CC	9	0
				CC	14	1
				CC	10	1
				CC	3	1
				CC	3	1
				CC	2	1
				CC	35	0
				CC	4	1
				CC	2	1
				CC	6	1
				CC	1	1
				CC	35	0
				CC	35	0
				CC	5	1
				CC	23	1
				CC	5	1
				CC	11	1
				CC	9	1
				CC	7	1
				CC	35	0
				CC	12	1
				CC	35	0
				CC	4	0
				CC	7	1
				CC	9	1
				CC	4	1
				CC	1	1
				CC	24	0
				CC	35	0
				CC	19	1
				CC	6	1
				CC	14	1
				CC	5	0
				CC	8	1
				CC	5	1
				CC	4	0
				CC	3	1
				CC	7	1
				CC	22	1
				CC	35	0
				CC	4	1
				CC	6	1
				CC	3	1
				CC	5	0
				CC	13	0
				CC	4	1
				CC	3	1
				CC	7	1
				Cov-DA	6		1
				Cov-DA	6		1
				Cov-DA	3		1
				Cov-DA	3		1
				Cov-DA	7		1
				Cov-DA	7		1
				Cov-DA	1		1
				Cov-DA	35		0
				Cov-DA	6		1
				Cov-DA	7		1
				Cov-DA	3		1
				Cov-DA	2		1
				Cov-DA	2		1
				Cov-DA	8		1
				Cov-DA	12		1
				Cov-DA	24		0
				Cov-DA	6		1
				Cov-DA	2		1
				Cov-DA	3		1
				Cov-DA	3		1
				Cov-DA	4		1
				Cov-DA	5		1
				Cov-DA	35		0
				Cov-DA	4		1
				Cov-DA	4		1
				Cov-DA	6		1
				Cov-DA	8		1
				Cov-DA	9		1
				Cov-DA	6		1
				Cov-DA	2		1

## Sheet: 3D
			fig. 3D
				Days	T-BAC	R-BAC+DA
				28	0
				1	0
				4	0
				2	0
				10	0
				35	0
				31	0
				2	0
				3	0
				35	0
				4	0
				18	0
				4	0
				10	1
				35	0
				3	0
				3	0
				2	0
				11	0
				5	0
				7	0
				9	1
				14	0
				10	0
				3	0
				3	0
				2	0
				35	0
				4	0
				2	0
				6	0
				1	0
				35	0
				35	0
				5	0
				23	0
				5	0
				11	0
				9	0
				7	0
				35	0
				12	0
				35	0
				4	1
				7	0
				9	0
				4	0
				1	0
				24	1
				35	0
				19	0
				6	0
				14	0
				5	1
				8	0
				5	0
				4	1
				3	0
				7	0
				22	0
				35	0
				4	0
				6	0
				3	0
				5	1
				13	1
				4	0
				3	0
				7	0
				6		0
				6		0
				3		0
				3		0
				7		0
				7		0
				1		0
				35		0
				6		0
				7		0
				3		0
				2		0
				2		0
				8		0
				12		0
				24		1
				6		0
				2		0
				3		0
				3		0
				4		0
				5		0
				35		0
				4		0
				4		0
				6		0
				8		0
				9		0
				6		0
				2		0

## Sheet: 3E
		Fig. 3E
		final CRP/baseline CRP	T-BAC	R-BAC+DA
		(1-6)	0.15942	0.0666667
		(1-0.5)	0.391304	0.233333
		(0.5-0.2)	0.188406	0.333333
		(0.2-0.06)	0.115942	0.2
		(0.06-0.03)	0.144928	0.166667
