# Supplementary material for: Anti-inflammatory therapy with nebulized dornase alfa for severe COVID-19 pneumonia: a randomized unblinded trial
Source: eLife. 2024 Jul 16;12:RP87030. doi: 10.7554/eLife.87030 (PMC11251720; doi:10.7554/eLife.87030)
Supplement: Figure 4—source data 1. [file elife-87030-fig4-data1.xlsx]

## Sheet: 4A
			Fig. 4A
			Days	T-BAC																																					R-BAC+DA
			3	-0.44		0.82	-0.08	0.5	0.14	0.26	0.17	0.31	0.09	0.34	0.58	-0.16	0.35	0.33	-0.18	-0.42			0.06	0.42	-0.39	0.3	0.09	-0.03	0.64		0.05	-0.05	-0.01	0.51	-0.02	0.62		0.03			-0.1	0.4	0.25	0.39	0.04	0.17	-0.05	0.49	0.45
			5	-0.43		1.28	-0.03	-0.28	0.03		0.69				0.79	0.05	0.28			0.07	-0.01	0.35	0.06	0.14	-0.21	-0.18		0.15	0.52	0.57					-0.1		1.25	0.27			0.59	0.63		0.22	0.43	0.2	0.04	0.33
			7	-0.5		0.9	0.27	0.02	0.35		0.69					0.69	0.62			-0.17	0.04			0.61	0.74	-0.2	0.12	0.24		0.14					0.07	0.43		0.09			1.26	0.65		0.38	0.57		0.09
																																				N	71				N	52
[truncated: 14 more columns]

## Sheet: 4B left
			Fig. 4B left
			Days	T-BAC partial												R-BAC+DA partial
			1	600	4460	410	440	550	1880	470	740	1270	570	370		200	380	400	890	940	1060	800	310	660	6580	190	520	490	1180	1460	640	1600	1180	490	570	1220	310	820	360	320	430	340	1600
			3	650	43610	1080	530	2270	3450	280	860	1330	1160	260		190	360	340	1180	1200	930	340	340	1240	2920	190	280	590	990	650	840	1880	760	460	470	1040	510	890	280	250	480	390	1830
			5	740	10400	1010			3260	280		2730	57750			190			980	1580		1170	500	910	1830			790	730	1690	500				310	4870		740		350	330	350
			7	430	5810					280		3840							930	1250		1310		770				460	600							22000				240		450
				Partial: D-Dimer was not measured in all patients

## Sheet: 4B right
				Fig 4B right
				Max d-dimer / patient
				R-BAC	R-BAC+DA
				740
				43610
				1080
				530
				2270
				3450
				470
				860
				3840
		N=11		57750
				370
					200		N=28
					380
					400
					1180
					1580
					1060
					1310
					500
					1240
					6580
					190
					520
					790
					1180
					1690
					840
					1880
					1180
					490
					570
					22000
					510
					890
					360
					350
					480
					450
					1830

## Sheet: 4C left
		Fig. 4C
			N=22											N=89
		Days	R-BAC											R-BAC+DA																															HD
		1	100.75	72.026	93.4319	99.116	201.531	96.6572	135.506	82.7145	104.294	65.9948		80.6752	72.5033	115.055	87.6899	101.748	93.3885	73.3856	107.187	86.2002	90.5826	120.102	86.0555	104.815	77.9705	95.37	77.2618	88.7457	81.8756	113.565	109.356	106.246	103.412	57.6205	112.379	81.1235	78.7804	87.5308	82.107	75.5985	108.141		55.3787	66.1539	60.3541	62.4223	64.534
		3	116.371			99.116	114.548	125.237	312.538		101.126	91.5082		76.9725	73.2265	95.5869	94.3431	114.476	111.121	104.728	113.666	99.0148	92.7087	108.922	92.7521	98.6966	95.7316	89.0784	81.2971	106.666		104.251	136.2	116.284	88.2829	86.0266	93.6922	77.7969	111.468	165.503	85.4481	96.9031	109.732
		5	120.536					133.684							81.4128			76.177	84.2332		111.193	82.7868	89.035	108.705			83.0616	86.1857	82.9604	95.4423					82.4542	153.773		101.416		71.5487	67.1663	67.2386
		7	150.418					102.587								67.5568		89.2375	66.1394		128.072		102.573				83.7703	87.4006	111.338											86.5907	77.0304
		30	114.577												93.1426		88.3263				89.4689
[truncated: 8 more columns]

## Sheet: 4C right
		Fig. 4C
			N=12	N=59	N=13
			R-BAC	R-BAC+DA	HD
			116.371	76.9725	55.3787
				73.2265	66.1539
				95.5869	60.3541
			99.116	94.3431	62.4223
			114.548	114.476	64.534
			125.237	111.121	56.4779
			312.538	104.728	56.5213
				113.666	56.1886
			101.126	99.0148	56.5502
			91.5082	92.7087	64.7509
			120.536	108.922	55.1472
				92.7521	55.8993
				98.6966	47.12
				95.7316
				89.0784
			133.684	81.2971
			150.418	106.666
				104.251
				136.2
				116.284
			102.587	88.2829
			114.577	86.0266
				93.6922
				77.7969
				111.468
				165.503
				85.4481
				96.9031
				109.732
				81.4128
				76.177
				84.2332
				111.193
				82.7868
				89.035
				108.705
				83.0616
				86.1857
				82.9604
				95.4423
				82.4542
				153.773
				101.416
				71.5487
				67.1663
				67.2386
				67.5568
				89.2375
				66.1394
				128.072
				102.573
				83.7703
				87.4006
				111.338
				93.1426
				88.3263
				89.4689
				86.5907
				77.0304

## Sheet: 4D
				fig. 4D
					CRP final/first norm
				N=34
				DNA last value	R-BAC	R-BAC+DA
				114.577	0.97157
					0.848
				99.116	0.0640097
				114.548	0.395712
				102.587	0.349745
				312.538	1.7577
				82.7145	0.0824742
				101.126	0.291005
				91.5082	0.100536
						0.774194
						0.0531561
						0.295985
				88.3263		0.112707
				89.2375		0.11353
				66.1394		0.0898058
				104.728		0.638107
				89.4689		0.235654
				82.7868		0.0897727
				102.573		0.1
				108.705		0.388747
				92.7521		0.186178
				98.6966		0.336683
				83.7703		0.0393701
				87.4006		0.654846
				111.338		2.67516
				95.4423		0.150794
				81.8756		0.270358
				104.251		0.187266
						0.209272
				116.284		0.16206
				82.4542		0.0518962
				153.773		1.44397
				93.6922		0.197867
				101.416		0.169981
				111.468		0.339526
				86.5907		0.0279503
				77.0304		0.0252101
				67.2386		0.0757156
				109.732		0.204355

## Sheet: 4E
				Fig. 4E
					n=51	n=29				n=3	n=12
					R-BAC+DA					R-BAC
				DNA (μg/ml)					DNA (μg/ml)	CRP BAC
				57.6204802*	1220				72.0260341*
				66.1394272*	1250				82.7144923*
				67.1663292*	480				93.4318774*
				67.2386462*	450				96.6572172*	1270
				67.5568412*	340				99.1159965*	470
				71.5487417*	350				99.1159965*	280
				72.5033266*	200				100.750362*		1880
				73.226497*	190				101.12641*		260
				73.3855944*	1060				102.587214*		3840
				75.5984958*	340				104.293896*		370
				76.1770321*	980				114.548452*		860
				77.0303732*	330				114.577379*
				77.2617877*	1460				116.370842*
				77.7969338*	890				120.536303*		3450
				77.9704946*	490				125.236911*		1330
				78.7804455*	360				133.683541*		2730
				81.1235175*	820				135.50593*		570
				81.2970784*	650				150.417703*		3260
				81.4127857*	190				201.531386*		740
				81.8756147*					312.538039*		57750
				82.1070292*	430
				82.454151*	310
				82.7868094*	500
				82.9603703*	1690
				83.0616141*	790
				83.7703211*	460
				84.2331501*	1580
				85.4480764*
				86.0266127*	1040
				86.0555395*	190
				86.1857102*	730
				86.2001736*	310
				86.5906856*	240
				87.4006364*	600
				87.5308071*	320
				87.6899045*	400
				88.2829043*	470
				88.3262945*
				88.7457333*	640
				89.0350014*	910
				89.0783917*	990
				89.2374892*	930
				89.4689037*
				90.5825861*	660
				92.708707*	1240
				92.7520972*	190
				93.1426092*
				93.3884871*	940
				93.6922187*	510
				94.343072*	340
				95.369974*	1180
				95.442291*	500
				95.5869251*
				95.7315592*	590
				96.9030952*	350
				98.6965577*	280
				99.0147527*	340
				101.415678*		740
				101.748337*		890
				102.572751*		770
				103.411629*		570
				104.250506*		1880
				104.727799*		930
				104.814579*		520
				106.246456*		490
				106.665895*		840
				107.186578*		800
				108.141163*		1600
				108.705236*		1830
				108.922187*		2920
				109.356089*		1180
				109.732138*		1830
				111.120625*		1200
				111.192942*		1170
				111.337576*
				111.467747*		280
				112.378941*		310
				113.564941*		1600
				113.666185*		340
				114.476135*		1180
				115.054672*		380
				116.284061*		460
				120.102401*		6580
				128.071739*		1310
				136.200174*		760
				153.773214*		4870
				165.503037*		250
